# Supplementary material for: Alkyne substituted mononuclear photocatalysts based on [RuCl(bpy)(tpy)]+
Source: Royal Society of Chemistry journal article supplement (doi:10.1039/c5dt01278c), 2015-01-01
Supplement: c5dt01278c1.pdf [file c5dt01278c1.pdf]

## SUPPORTING INFORMATION

### Alkyne substituted Thummel type photocatalysts

Ross J. Davidson,<sup>†</sup> Lucy E. Wilson,<sup>†</sup> Paul J. Low<sup>‡\*</sup> Andrew R. Duckworth<sup>†</sup>, Dima Yurfit<sup>†</sup>  
and Andrew Beeby<sup>†</sup>.

<sup>†</sup>Department of Chemistry, University of Durham, South Road, Durham DH1 3LE, England.

<sup>‡</sup>School of Chemistry and Biochemistry, University of Western Australia, 35 Stirling  
Highway, Crawley, 6009 WA, Australia.

## S1. Crystal structure selected bond lengths and angles

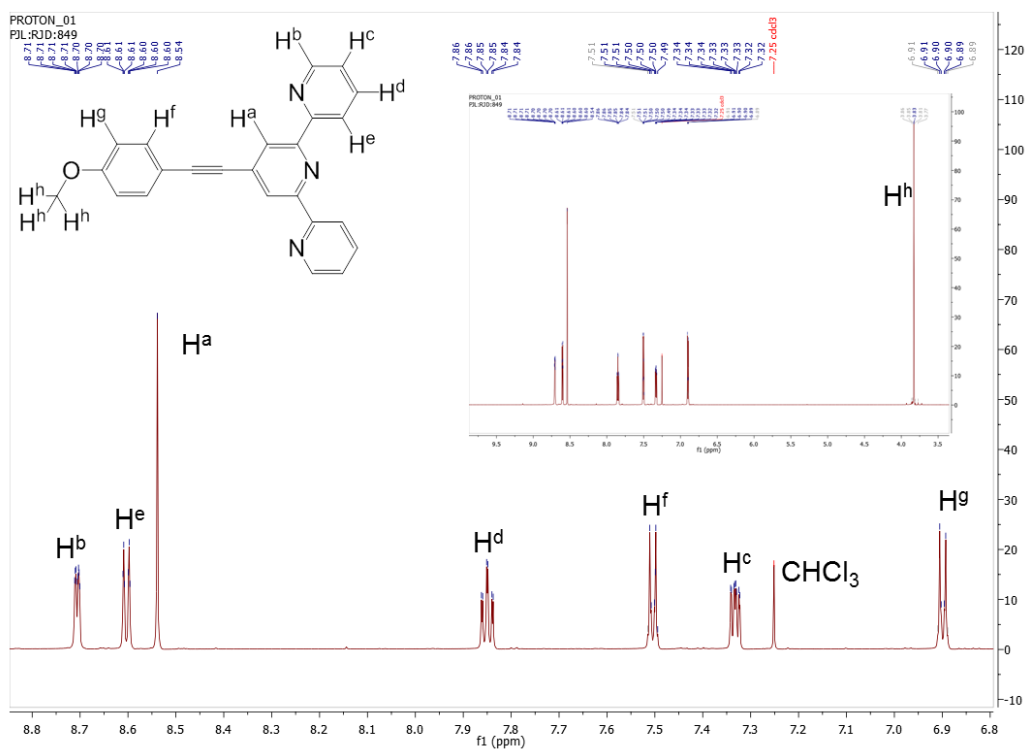

Figure S1.1  $^1\text{H}$  NMR spectra of  $\text{L}^2$  recorded in  $\text{CDCl}_3$ .

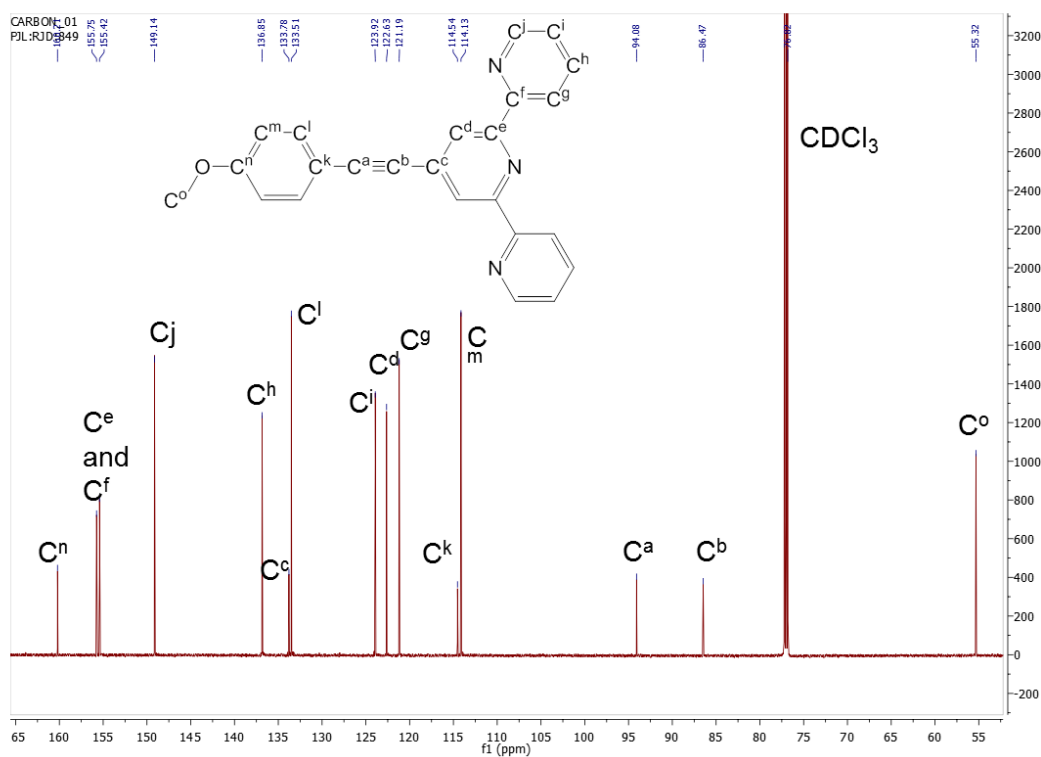

Figure S1.2  $^{13}\text{C}$  NMR spectra of  $\text{L}^2$  recorded in  $\text{CDCl}_3$ .

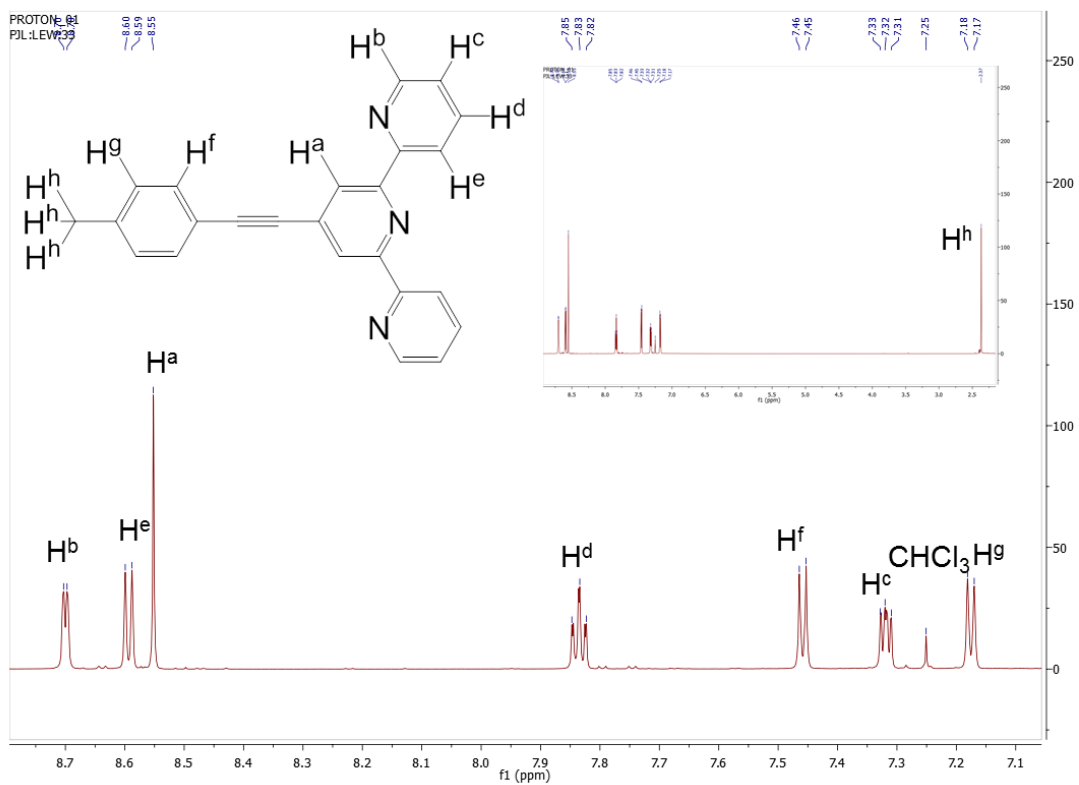

**Figure S1.3**  $^1\text{H}$  NMR spectra of  $\text{L}^3$  recorded in  $\text{CDCl}_3$ .

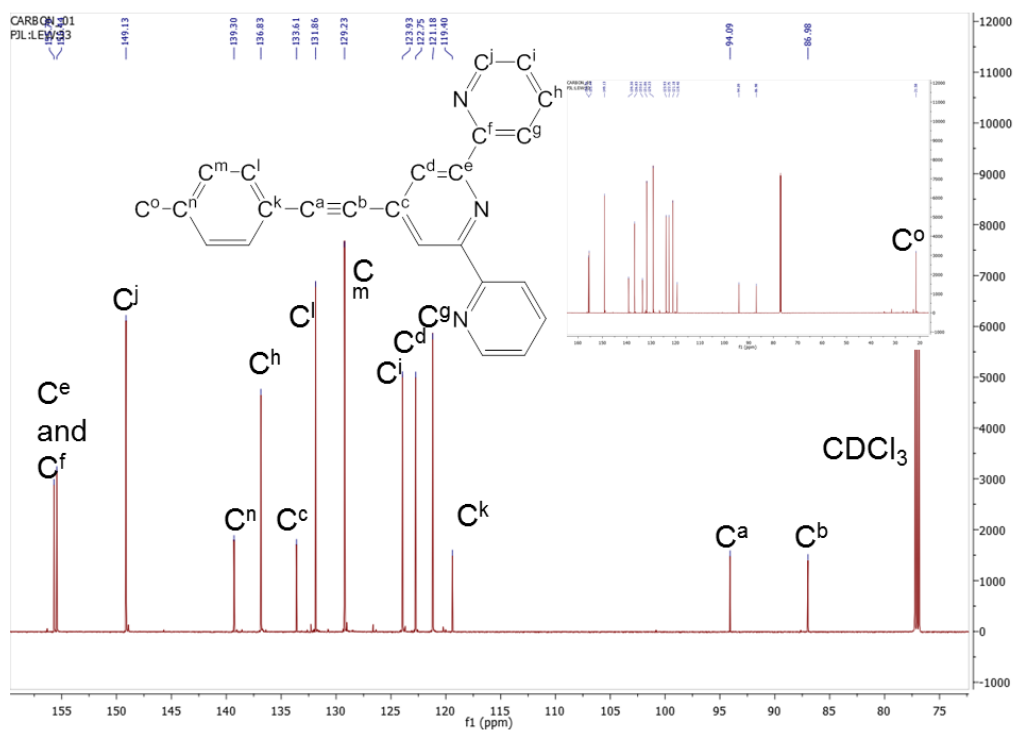

**Figure S1.4**  $^{13}\text{C}$  NMR spectra of  $\text{L}^3$  recorded in  $\text{CDCl}_3$ .

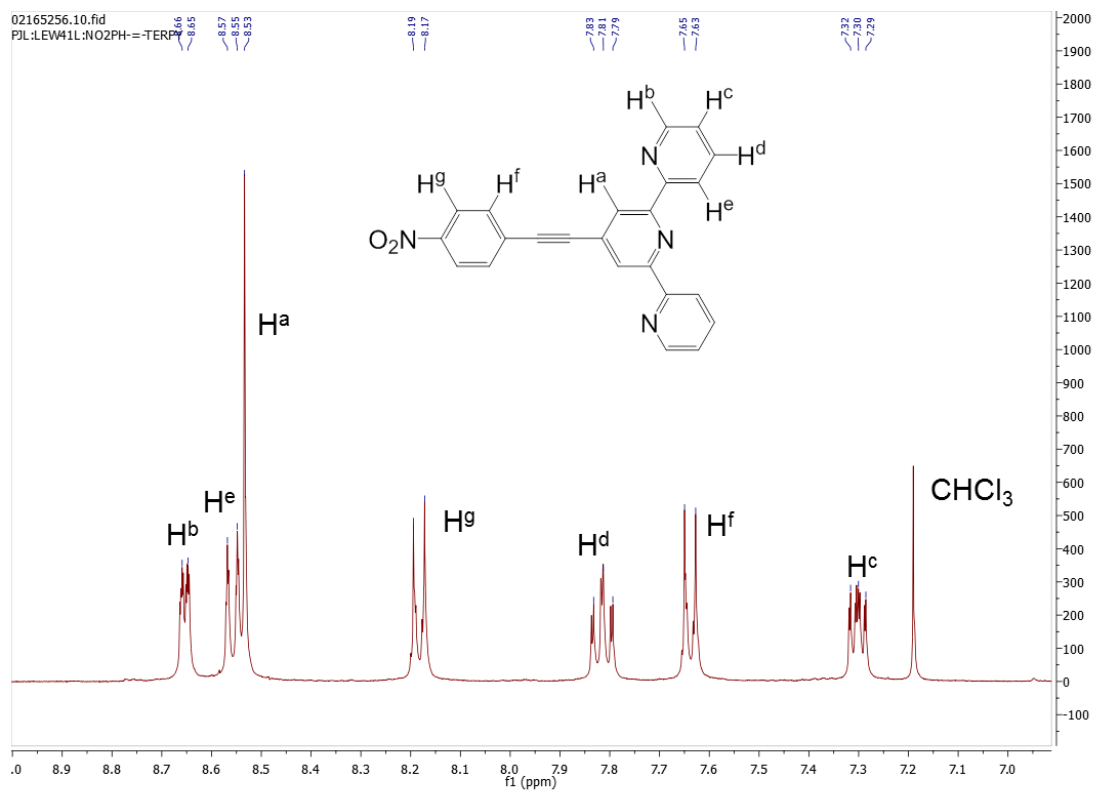

Figure S1.5  $^1H$  NMR spectra of  $L^4$  recorded in  $CDCl_3$ .

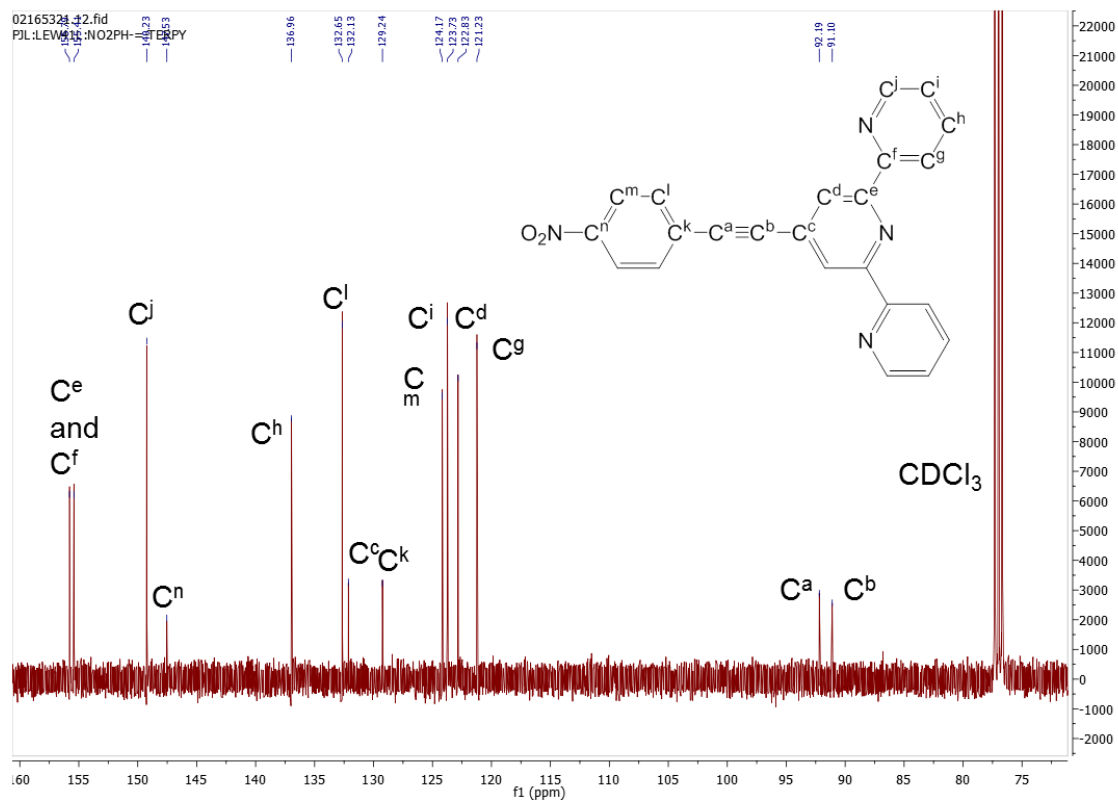

Figure S1.6  $^{13}C$  NMR spectra of  $L^3$  recorded in  $CDCl_3$ .

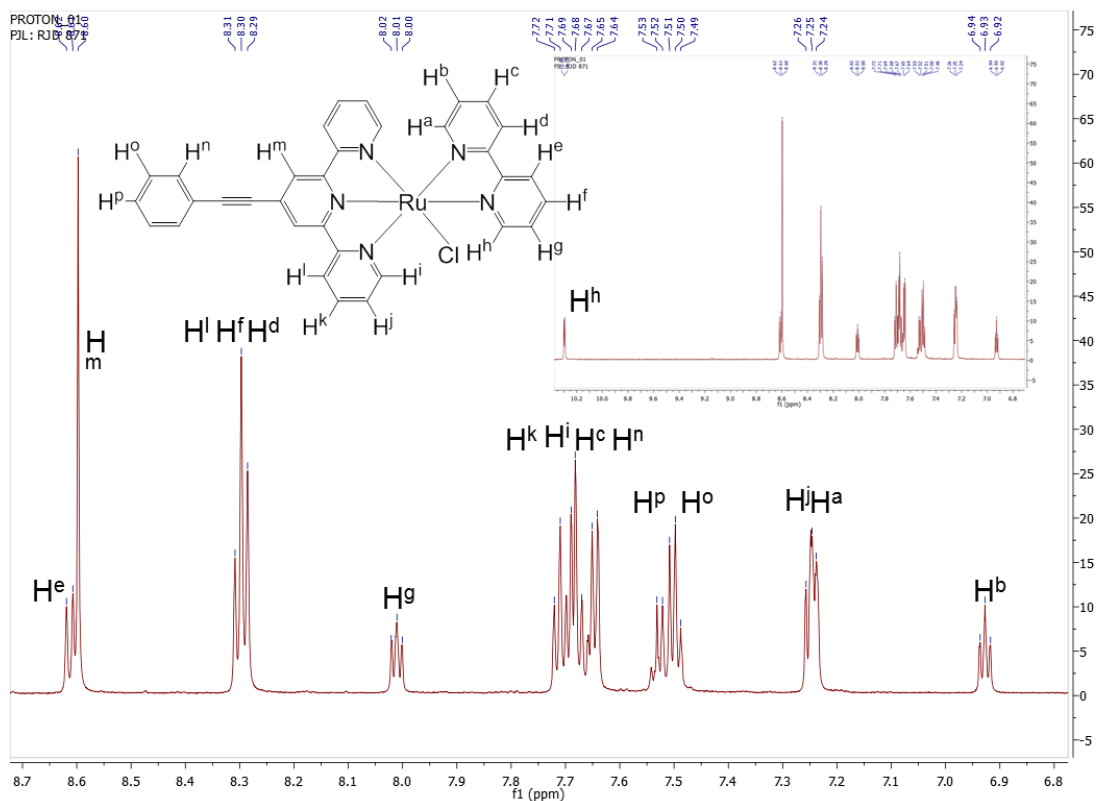

Figure S1.7  $^1\text{H}$  NMR spectra of  $[1\text{Cl}]\text{PF}_6$  recorded in  $\text{CD}_3\text{CN}$ .

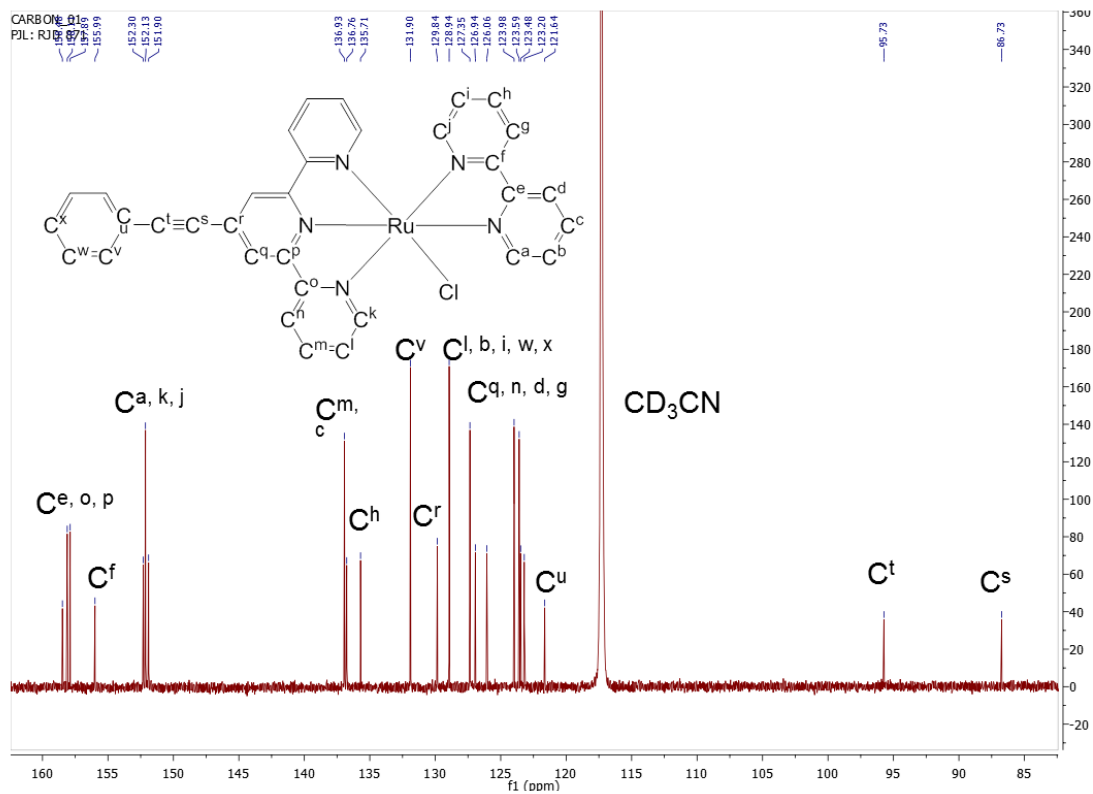

Figure S1.8  $^{13}\text{C}$  NMR spectra of  $[1\text{Cl}]\text{PF}_6$  recorded in  $\text{CD}_3\text{CN}$ .

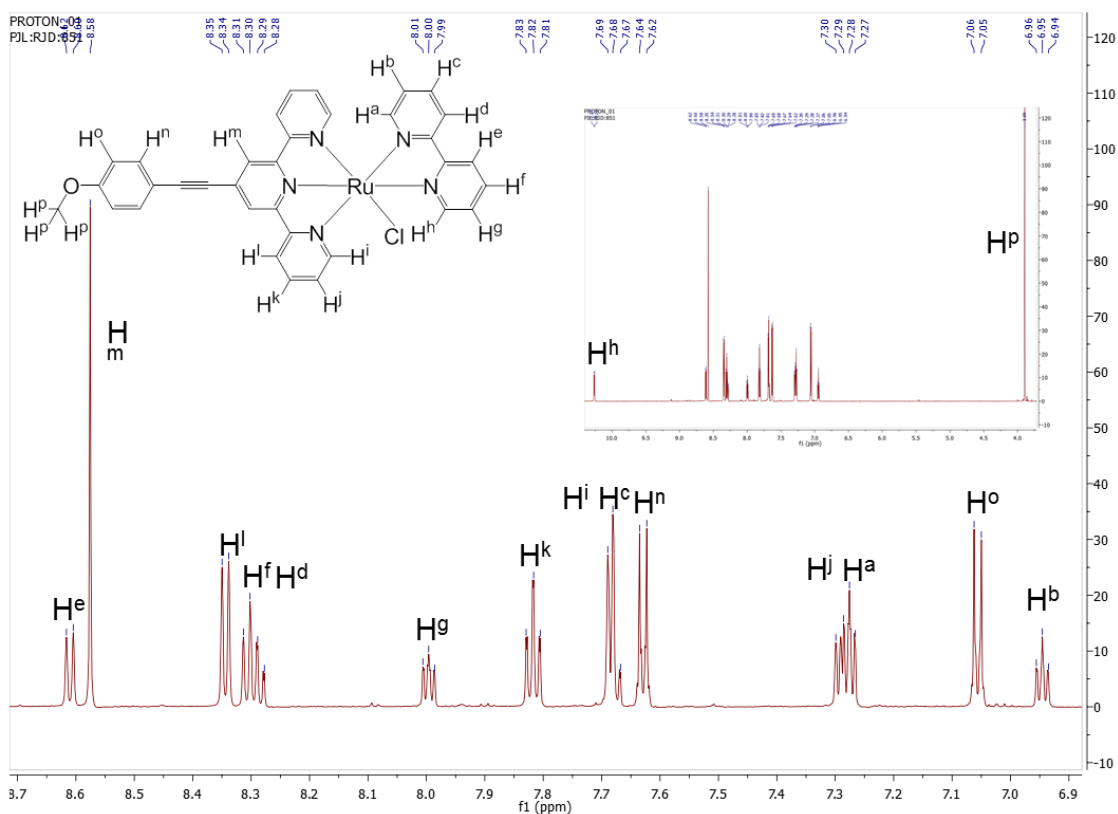

**Figure S1.9**  $^1\text{H}$  NMR spectra of  $[\mathbf{2Cl}]\text{PF}_6$  recorded in  $\text{CD}_3\text{CN}$ .

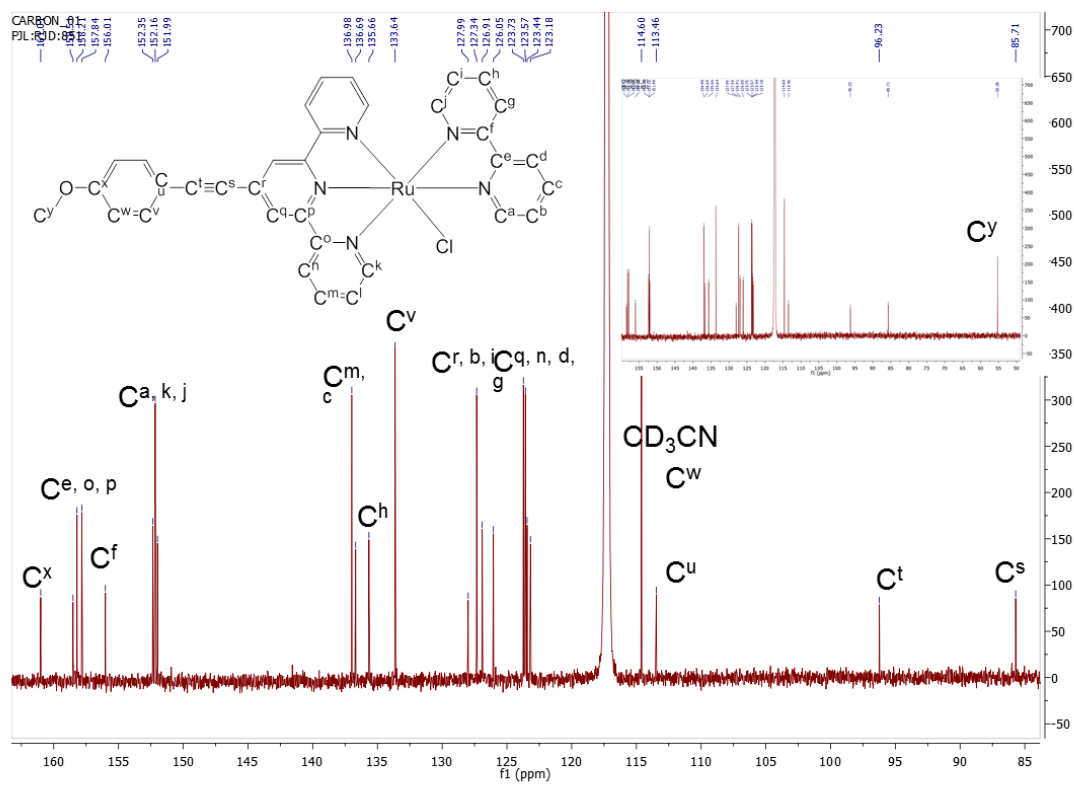

**Figure S1.10**  $^{13}\text{C}$  NMR spectra of  $[\mathbf{2Cl}]\text{PF}_6$  recorded in  $\text{CD}_3\text{CN}$ .

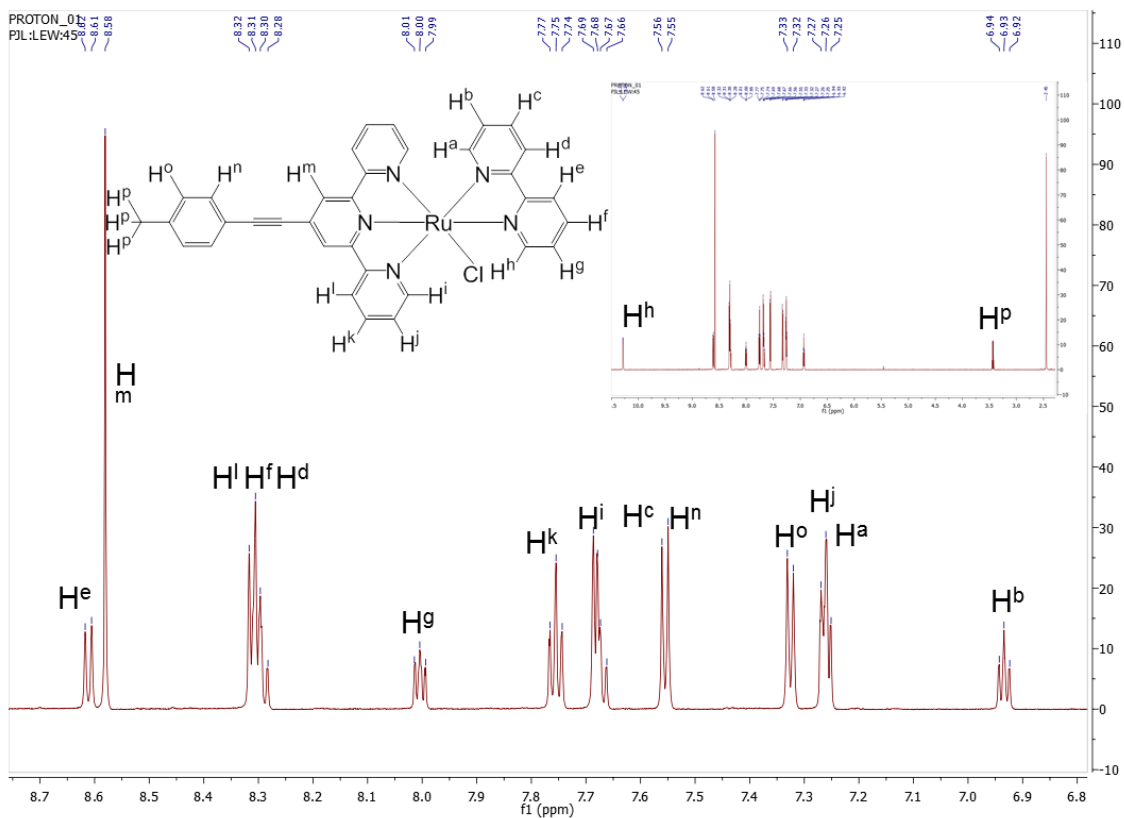

**Figure S1.11**  $^1\text{H}$  NMR spectra of  $[\text{3Cl}]\text{PF}_6$  recorded in  $\text{CD}_3\text{CN}$ .

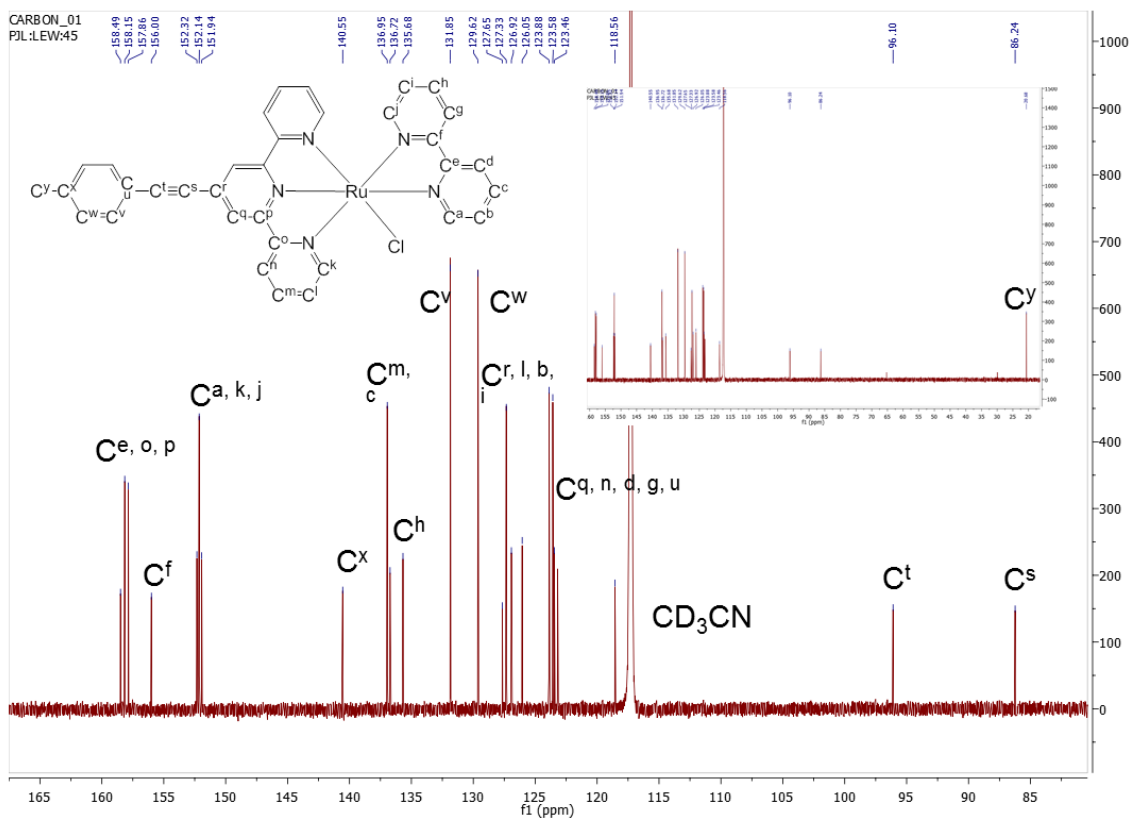

**Figure S1.12**  $^{13}\text{C}$  NMR spectra of  $[\text{3Cl}]\text{PF}_6$  recorded in  $\text{CD}_3\text{CN}$ .

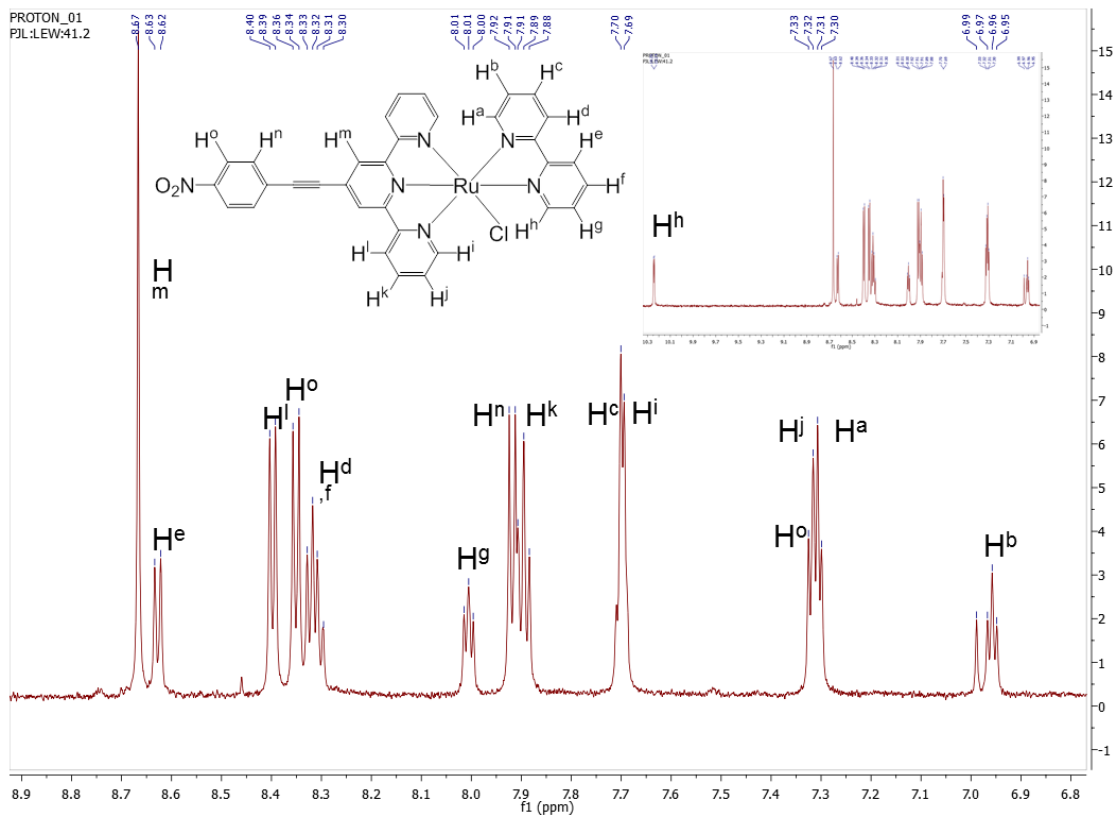

**Figure S1.13**  $^1H$  NMR spectra of  $[4Cl]PF_6$  recorded in  $CD_3CN$ .

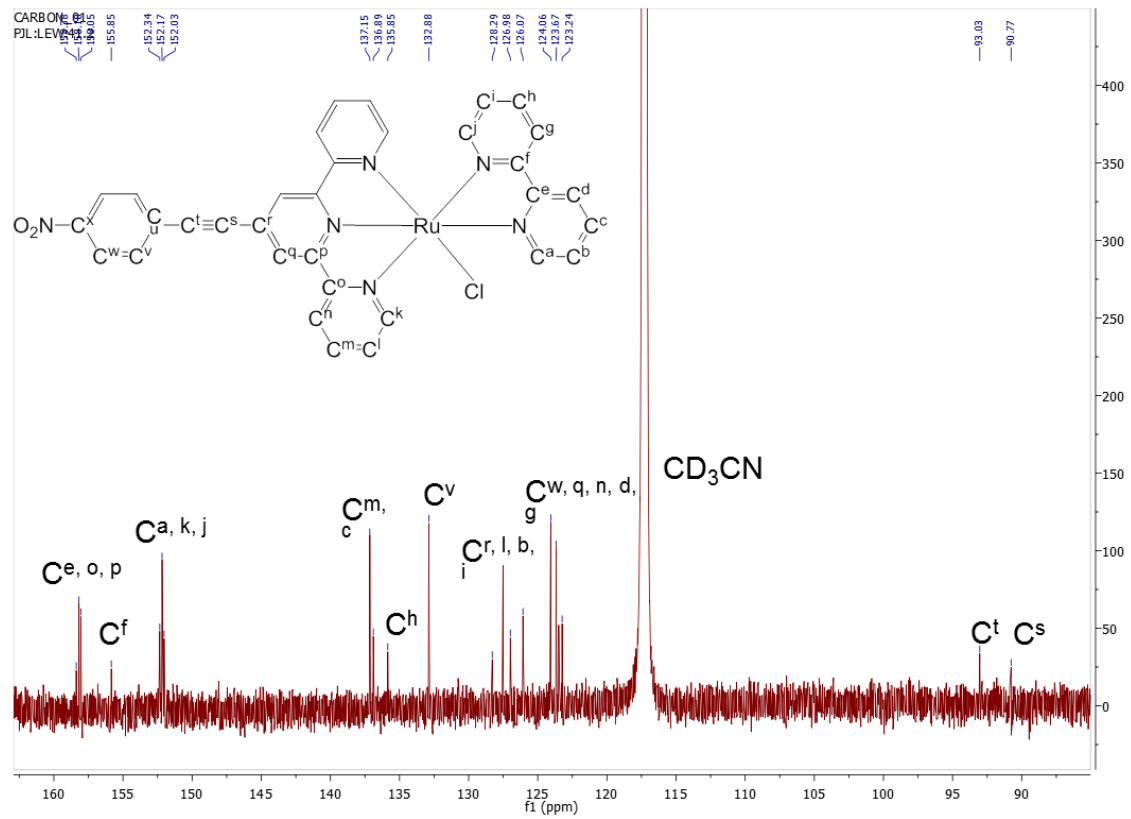

**Figure S1.14**  $^{13}C$  NMR spectra of  $[4Cl]PF_6$  recorded in  $CD_3CN$ .



## S2. Crystal structure refinement, selected bond lengths and angles

**Table S2.1.** Crystal and Refinement Data for  $L^3$ ,  $[3Cl]PF_6 \cdot CH_3CN \cdot C_4H_{10}O$  and  $[4Cl]PF_6 \cdot 2CH_3CN$

| Compound                                | $L^3$             | $[3Cl]PF_6 \cdot CH_3CN \cdot C_4H_{10}O$ | $[4Cl]PF_6 \cdot 2CH_3CN$    |
|-----------------------------------------|-------------------|-------------------------------------------|------------------------------|
| molecular formula                       | $C_{24}H_{17}N_3$ | $C_{40}H_{38}ClF_6N_6OPRu$                | $C_{37}H_{28}ClF_6N_8O_2PRu$ |
| $M$ (g mol <sup>-1</sup> )              | 347.41            | 900.25                                    | 898.16                       |
| $T$ (K)                                 | 120               | 120                                       | 120                          |
| crystal system                          | Monoclinic        | Triclinic                                 | Triclinic                    |
| space group                             | $P2_1/c$          | P-1                                       | P-1                          |
| $a$ (Å)                                 | 4.7572(4)         | 12.0142(14)                               | 10.5971(4)                   |
| $b$ (Å)                                 | 19.9132(17)       | 13.6517(16)                               | 12.7714(5)                   |
| $c$ (Å)                                 | 18.6841(16)       | 24.769(3)                                 | 15.9819(6)                   |
| $\alpha$ (deg.)                         | 90                | 74.903(3)                                 | 69.0510(10)                  |
| $\beta$ (deg.)                          | 91.698(3)         | 81.701(3)                                 | 74.7880(10)                  |
| $\gamma$ (deg.)                         | 90                | 82.307(3)                                 | 68.1910(10)                  |
| $V$ (Å <sup>3</sup> )                   | 1769.2(3)         | 3861.4(8)                                 | 1854.38(12)                  |
| $Z$                                     | 4                 | 4                                         | 2                            |
| $\mu$ (Mo K $\alpha$ ) mm <sup>-1</sup> | 0.078             | 0.587                                     | 0.615                        |
| $\rho_{calc}$ (g cm <sup>-3</sup> )     | 1.304             | 1.549                                     | 1.609                        |
| $2\Theta$ range for data collection (°) | 2.98-52           | 3.1-59                                    | 2.76-57                      |
| number of unique reflections            | 16451             | 66133                                     | 22279                        |
| data/restraints/parameters              | 3470/0/312        | 21526/150/1002                            | 9367/3/626                   |
| Final $R$ indices [ $I > 2\sigma(I)$ ]  | $R_I = 0.0712$    | $R_I = 0.0590$                            | $R_I = 0.0442$               |
|                                         | $wR_2 = 0.1651$   | $wR_2 = 0.1529$                           | $wR_2 = 0.0878$              |
| $R$ indices (all data)                  | $R_I = 0.1277$    | $R_I = 0.0910$                            | $R_I = 0.0783$               |
|                                         | $wR_2 = 0.1865$   | $wR_2 = 0.1767$                           | $wR_2 = 0.1012$              |
| goodness-of-fit on $F^2$                | 1.016             | 1.024                                     | 0.999                        |

**Table S2.2** Bond Lengths for L<sup>3</sup>.

| Atom | Atom | Length/Å | Atom | Atom | Length/Å |
|------|------|----------|------|------|----------|
| N1   | C1   | 1.347(4) | C9   | C10  | 1.387(4) |
| N1   | C5   | 1.342(4) | C10  | C11  | 1.489(4) |
| N2   | C6   | 1.344(4) | C11  | C12  | 1.380(4) |
| N2   | C10  | 1.347(4) | C12  | C15  | 1.376(5) |
| N3   | C11  | 1.346(4) | C13  | C14  | 1.376(5) |
| N3   | C13  | 1.334(4) | C14  | C15  | 1.381(5) |
| C1   | C2   | 1.375(5) | C16  | C17  | 1.202(4) |
| C2   | C3   | 1.385(5) | C17  | C18  | 1.434(4) |
| C3   | C4   | 1.371(5) | C18  | C19  | 1.399(4) |
| C4   | C5   | 1.392(4) | C18  | C23  | 1.390(4) |
| C5   | C6   | 1.484(4) | C19  | C20  | 1.375(5) |
| C6   | C7   | 1.391(4) | C20  | C21  | 1.397(4) |
| C7   | C8   | 1.396(4) | C21  | C22  | 1.388(4) |
| C8   | C9   | 1.391(4) | C21  | C24  | 1.497(5) |
| C8   | C16  | 1.433(4) | C22  | C23  | 1.390(5) |

**Table S2.3** Bond Angles for L<sup>3</sup>.

| Atom | Atom | Atom | Angle/°  | Atom | Atom | Atom | Angle/°  |
|------|------|------|----------|------|------|------|----------|
| C5   | N1   | C1   | 117.2(3) | C9   | C10  | C11  | 121.8(3) |
| C6   | N2   | C10  | 118.1(3) | N3   | C11  | C10  | 116.1(3) |
| C13  | N3   | C11  | 117.2(3) | N3   | C11  | C12  | 122.2(3) |
| N1   | C1   | C2   | 124.0(3) | C12  | C11  | C10  | 121.8(3) |
| C1   | C2   | C3   | 117.7(3) | C15  | C12  | C11  | 119.7(3) |
| C4   | C3   | C2   | 119.6(3) | N3   | C13  | C14  | 124.1(4) |
| C3   | C4   | C5   | 119.0(3) | C13  | C14  | C15  | 118.2(3) |
| N1   | C5   | C4   | 122.3(3) | C12  | C15  | C14  | 118.6(3) |
| N1   | C5   | C6   | 116.3(3) | C17  | C16  | C8   | 176.6(3) |
| C4   | C5   | C6   | 121.3(3) | C16  | C17  | C18  | 177.0(3) |
| N2   | C6   | C5   | 115.4(3) | C19  | C18  | C17  | 120.5(3) |
| N2   | C6   | C7   | 123.0(3) | C23  | C18  | C17  | 121.3(3) |
| C7   | C6   | C5   | 121.6(3) | C23  | C18  | C19  | 118.2(3) |
| C6   | C7   | C8   | 118.7(3) | C20  | C19  | C18  | 120.6(3) |
| C7   | C8   | C16  | 121.5(3) | C19  | C20  | C21  | 121.6(3) |
| C9   | C8   | C7   | 118.3(3) | C20  | C21  | C24  | 120.0(3) |
| C9   | C8   | C16  | 120.2(3) | C22  | C21  | C20  | 117.8(3) |
| C10  | C9   | C8   | 119.4(3) | C22  | C21  | C24  | 122.3(3) |
| N2   | C10  | C9   | 122.5(3) | C21  | C22  | C23  | 121.0(3) |
| N2   | C10  | C11  | 115.7(3) | C18  | C23  | C22  | 120.8(3) |

**Table S2.4** Bond Lengths for  $3\text{Cl}\cdot\text{CH}_3\text{CN}\cdot\text{C}_5\text{H}_{10}\text{O}$ .

| Atom | Atom | Length/Å   | Atom | Atom | Length/Å |
|------|------|------------|------|------|----------|
| Ru1  | Cl1  | 2.4093(10) | C4A  | C5A  | 1.386(6) |
| Ru1  | N1   | 2.073(3)   | C5A  | C6A  | 1.471(6) |
| Ru1  | N2   | 1.963(3)   | C6A  | C7A  | 1.387(5) |
| Ru1  | N3   | 2.066(3)   | C7A  | C8A  | 1.402(6) |
| Ru1  | N4   | 2.035(3)   | C8A  | C9A  | 1.406(6) |
| Ru1  | N5   | 2.082(3)   | C8A  | C16A | 1.432(6) |
| N1   | C1   | 1.336(5)   | C9A  | C10A | 1.379(5) |
| N1   | C5   | 1.368(5)   | C10A | C11A | 1.480(5) |
| N2   | C6   | 1.354(5)   | C11A | C12A | 1.380(6) |
| N2   | C10  | 1.354(5)   | C12A | C13A | 1.385(6) |
| N3   | C11  | 1.372(5)   | C13A | C14A | 1.375(7) |
| N3   | C15  | 1.338(5)   | C14A | C15A | 1.375(6) |
| N4   | C25  | 1.346(5)   | C16A | C17A | 1.197(6) |
| N4   | C29  | 1.366(5)   | C17A | C18A | 1.436(6) |
| N5   | C30  | 1.354(5)   | C18A | C19A | 1.395(7) |
| N5   | C34  | 1.345(5)   | C18A | C23A | 1.401(6) |
| C1   | C2   | 1.384(6)   | C19A | C20A | 1.391(6) |
| C2   | C3   | 1.379(6)   | C20A | C21A | 1.386(8) |
| C3   | C4   | 1.381(6)   | C21A | C22A | 1.394(7) |
| C4   | C5   | 1.390(6)   | C21A | C24A | 1.516(6) |
| C5   | C6   | 1.474(6)   | C22A | C23A | 1.385(6) |
| C6   | C7   | 1.388(5)   | C25A | C26A | 1.379(6) |
| C7   | C8   | 1.406(6)   | C26A | C27A | 1.385(7) |
| C8   | C9   | 1.401(6)   | C27A | C28A | 1.377(7) |
| C8   | C16  | 1.435(6)   | C28A | C29A | 1.396(6) |
| C9   | C10  | 1.385(5)   | C29A | C30A | 1.467(6) |
| C10  | C11  | 1.480(6)   | C30A | C31A | 1.393(6) |
| C11  | C12  | 1.387(6)   | C31A | C32A | 1.383(7) |
| C12  | C13  | 1.380(6)   | C32A | C33A | 1.381(7) |
| C13  | C14  | 1.376(7)   | C33A | C34A | 1.381(6) |
| C14  | C15  | 1.391(6)   | P1A  | F1   | 1.703(5) |
| C16  | C17  | 1.197(6)   | P1A  | F2B  | 1.834(6) |
| C17  | C18  | 1.432(6)   | P1A  | F3A  | 1.553(6) |
| C18  | C19  | 1.406(6)   | P1A  | F4A  | 1.389(6) |
| C18  | C23  | 1.388(6)   | P1A  | F5B  | 1.649(6) |
| C19  | C20  | 1.389(6)   | P1A  | F6B  | 1.535(8) |
| C20  | C21  | 1.395(7)   | P1B  | F1   | 1.527(4) |
| C21  | C22  | 1.384(7)   | P1B  | F2A  | 1.570(4) |
| C21  | C24  | 1.511(6)   | P1B  | F3B  | 1.630(4) |
| C22  | C23  | 1.391(6)   | P1B  | F4B  | 1.632(4) |
| C25  | C26  | 1.372(6)   | P1B  | F5A  | 1.580(4) |
| C26  | C27  | 1.388(6)   | P1B  | F6A  | 1.633(7) |
| C27  | C28  | 1.384(7)   | P2   | F7   | 1.605(3) |
| C28  | C29  | 1.387(6)   | P2   | F8A  | 1.613(4) |
| C29  | C30  | 1.460(6)   | P2   | F8B  | 1.598(4) |

**Table S2.4 continued** Bond Lengths for **3Cl·CH<sub>3</sub>CN·C<sub>5</sub>H<sub>10</sub>O**.

| Atom | Atom | Length/Å   |  | Atom | Atom | Length/Å  |
|------|------|------------|--|------|------|-----------|
| C30  | C31  | 1.392(6)   |  | P2   | F9A  | 1.609(4)  |
| C31  | C32  | 1.383(7)   |  | P2   | F9B  | 1.592(4)  |
| C32  | C33  | 1.374(7)   |  | P2   | F10A | 1.583(4)  |
| C33  | C34  | 1.376(6)   |  | P2   | F10B | 1.614(4)  |
| Ru1A | Cl1A | 2.4089(11) |  | P2   | F11A | 1.617(4)  |
| Ru1A | N1A  | 2.065(3)   |  | P2   | F11B | 1.588(4)  |
| Ru1A | N2A  | 1.949(3)   |  | P2   | F12  | 1.576(3)  |
| Ru1A | N3A  | 2.067(3)   |  | O1   | C5S  | 1.358(10) |
| Ru1A | N4A  | 2.039(3)   |  | O1   | C7S  | 1.437(13) |
| Ru1A | N5A  | 2.075(3)   |  | O2   | C11S | 1.398(10) |
| N1A  | C1A  | 1.339(5)   |  | O2   | C9S  | 1.366(8)  |
| N1A  | C5A  | 1.374(5)   |  | C6S  | C5S  | 1.480(13) |
| N2A  | C6A  | 1.352(5)   |  | C7S  | C8S  | 1.599(16) |
| N2A  | C10A | 1.351(5)   |  | C10S | C9S  | 1.459(10) |
| N3A  | C11A | 1.372(5)   |  | C11S | C12S | 1.619(14) |
| N3A  | C15A | 1.337(5)   |  | N1SB | C1SB | 1.15(2)   |
| N4A  | C25A | 1.356(5)   |  | C1SB | C2SB | 1.35(3)   |
| N4A  | C29A | 1.362(5)   |  | N2S  | C3S  | 1.124(15) |
| N5A  | C30A | 1.364(6)   |  | C4S  | C3S  | 1.468(17) |
| N5A  | C34A | 1.351(6)   |  | N3S  | C3SA | 1.125(14) |
| C1A  | C2A  | 1.379(6)   |  | C4SA | C3SA | 1.378(14) |
| C2A  | C3A  | 1.384(7)   |  | C2SA | C1SA | 1.462(16) |
| C3A  | C4A  | 1.388(6)   |  | N1SA | C1SA | 1.162(18) |

Table S2.5 Bond Angles for 3Cl·CH<sub>3</sub>CN·C<sub>5</sub>H<sub>10</sub>O.

| Atom | Atom | Atom | Angle/°    | Atom | Atom | Atom | Angle/°  |
|------|------|------|------------|------|------|------|----------|
| N1   | Ru1  | C11  | 90.00(9)   | C9A  | C8A  | C16A | 121.5(4) |
| N1   | Ru1  | N5   | 101.75(13) | C10A | C9A  | C8A  | 118.8(4) |
| N2   | Ru1  | C11  | 87.52(10)  | N2A  | C10A | C9A  | 121.1(4) |
| N2   | Ru1  | N1   | 79.68(13)  | N2A  | C10A | C11A | 112.3(3) |
| N2   | Ru1  | N3   | 79.92(13)  | C9A  | C10A | C11A | 126.6(4) |
| N2   | Ru1  | N4   | 99.65(13)  | N3A  | C11A | C10A | 115.1(4) |
| N2   | Ru1  | N5   | 177.75(13) | N3A  | C11A | C12A | 121.3(4) |
| N3   | Ru1  | C11  | 90.41(9)   | C12A | C11A | C10A | 123.6(4) |
| N3   | Ru1  | N1   | 159.55(13) | C11A | C12A | C13A | 119.0(4) |
| N3   | Ru1  | N5   | 98.61(13)  | C14A | C13A | C12A | 119.6(4) |
| N4   | Ru1  | C11  | 172.69(10) | C13A | C14A | C15A | 119.1(4) |
| N4   | Ru1  | N1   | 89.89(13)  | N3A  | C15A | C14A | 122.6(4) |
| N4   | Ru1  | N3   | 92.24(13)  | C17A | C16A | C8A  | 174.8(5) |
| N4   | Ru1  | N5   | 78.67(13)  | C16A | C17A | C18A | 175.6(5) |
| N5   | Ru1  | C11  | 94.20(10)  | C19A | C18A | C17A | 120.8(4) |
| C1   | N1   | Ru1  | 127.9(3)   | C19A | C18A | C23A | 118.7(4) |
| C1   | N1   | C5   | 118.9(4)   | C23A | C18A | C17A | 120.4(4) |
| C5   | N1   | Ru1  | 113.3(3)   | C20A | C19A | C18A | 120.8(5) |
| C6   | N2   | Ru1  | 118.7(3)   | C21A | C20A | C19A | 120.4(5) |
| C10  | N2   | Ru1  | 118.5(3)   | C20A | C21A | C22A | 118.8(4) |
| C10  | N2   | C6   | 122.4(3)   | C20A | C21A | C24A | 120.9(5) |
| C11  | N3   | Ru1  | 113.4(3)   | C22A | C21A | C24A | 120.3(5) |
| C15  | N3   | Ru1  | 128.1(3)   | C23A | C22A | C21A | 121.4(5) |
| C15  | N3   | C11  | 118.6(4)   | C22A | C23A | C18A | 119.9(4) |
| C25  | N4   | Ru1  | 124.8(3)   | N4A  | C25A | C26A | 122.4(4) |
| C25  | N4   | C29  | 118.9(4)   | C25A | C26A | C27A | 119.0(4) |
| C29  | N4   | Ru1  | 116.2(3)   | C28A | C27A | C26A | 119.3(4) |
| C30  | N5   | Ru1  | 115.1(3)   | C27A | C28A | C29A | 119.7(4) |
| C34  | N5   | Ru1  | 126.1(3)   | N4A  | C29A | C28A | 120.9(4) |
| C34  | N5   | C30  | 118.8(4)   | N4A  | C29A | C30A | 114.8(4) |
| N1   | C1   | C2   | 122.6(4)   | C28A | C29A | C30A | 124.3(4) |
| C3   | C2   | C1   | 118.8(4)   | N5A  | C30A | C29A | 114.5(3) |
| C2   | C3   | C4   | 119.4(4)   | N5A  | C30A | C31A | 121.4(4) |
| C3   | C4   | C5   | 119.5(4)   | C31A | C30A | C29A | 124.1(4) |
| N1   | C5   | C4   | 120.8(4)   | C32A | C31A | C30A | 119.3(5) |
| N1   | C5   | C6   | 115.1(3)   | C33A | C32A | C31A | 119.7(4) |
| C4   | C5   | C6   | 124.1(4)   | C32A | C33A | C34A | 118.4(5) |
| N2   | C6   | C5   | 113.0(3)   | N5A  | C34A | C33A | 123.3(4) |
| N2   | C6   | C7   | 120.0(4)   | F1   | P1A  | F2B  | 74.9(3)  |
| C7   | C6   | C5   | 126.9(4)   | F3A  | P1A  | F1   | 85.8(4)  |
| C6   | C7   | C8   | 118.9(4)   | F3A  | P1A  | F2B  | 84.6(5)  |
| C7   | C8   | C16  | 119.7(4)   | F3A  | P1A  | F5B  | 167.5(5) |
| C9   | C8   | C7   | 119.4(4)   | F4A  | P1A  | F1   | 97.5(4)  |
| C9   | C8   | C16  | 120.8(4)   | F4A  | P1A  | F2B  | 171.4(6) |
| C10  | C9   | C8   | 119.5(4)   | F4A  | P1A  | F3A  | 99.3(6)  |

**Table S2.5 continued** Bond Angles for **3Cl·CH<sub>3</sub>CN·C<sub>5</sub>H<sub>10</sub>O**.

| <b>Atom</b> | <b>Atom</b> | <b>Atom</b> | <b>Angle/°</b> |  | <b>Atom</b> | <b>Atom</b> | <b>Atom</b> | <b>Angle/°</b> |
|-------------|-------------|-------------|----------------|--|-------------|-------------|-------------|----------------|
| N2          | C10         | C9          | 119.7(4)       |  | F4A         | P1A         | F5B         | 92.1(5)        |
| N2          | C10         | C11         | 113.1(3)       |  | F4A         | P1A         | F6B         | 80.6(5)        |
| C9          | C10         | C11         | 127.2(4)       |  | F5B         | P1A         | F1          | 87.5(3)        |
| N3          | C11         | C10         | 114.8(3)       |  | F5B         | P1A         | F2B         | 83.4(4)        |
| N3          | C11         | C12         | 120.9(4)       |  | F6B         | P1A         | F1          | 178.1(4)       |
| C12         | C11         | C10         | 124.2(4)       |  | F6B         | P1A         | F2B         | 106.9(5)       |
| C13         | C12         | C11         | 119.8(4)       |  | F6B         | P1A         | F3A         | 94.7(5)        |
| C14         | C13         | C12         | 119.2(4)       |  | F6B         | P1A         | F5B         | 92.2(4)        |
| C13         | C14         | C15         | 119.0(4)       |  | F1          | P1B         | F2A         | 101.6(3)       |
| N3          | C15         | C14         | 122.5(4)       |  | F1          | P1B         | F3B         | 88.0(3)        |
| C17         | C16         | C8          | 175.0(5)       |  | F1          | P1B         | F4B         | 83.9(3)        |
| C16         | C17         | C18         | 179.2(5)       |  | F1          | P1B         | F5A         | 94.8(3)        |
| C19         | C18         | C17         | 120.6(4)       |  | F1          | P1B         | F6A         | 175.6(3)       |
| C23         | C18         | C17         | 120.7(4)       |  | F2A         | P1B         | F3B         | 88.5(4)        |
| C23         | C18         | C19         | 118.7(4)       |  | F2A         | P1B         | F4B         | 169.9(5)       |
| C20         | C19         | C18         | 119.9(4)       |  | F2A         | P1B         | F5A         | 98.5(4)        |
| C19         | C20         | C21         | 121.2(4)       |  | F2A         | P1B         | F6A         | 75.0(4)        |
| C20         | C21         | C24         | 120.5(5)       |  | F3B         | P1B         | F4B         | 83.3(4)        |
| C22         | C21         | C20         | 118.4(4)       |  | F3B         | P1B         | F6A         | 94.7(4)        |
| C22         | C21         | C24         | 121.1(5)       |  | F4B         | P1B         | F6A         | 99.9(4)        |
| C21         | C22         | C23         | 121.1(4)       |  | F5A         | P1B         | F3B         | 171.8(5)       |
| C18         | C23         | C22         | 120.6(4)       |  | F5A         | P1B         | F4B         | 89.4(4)        |
| N4          | C25         | C26         | 122.5(4)       |  | F5A         | P1B         | F6A         | 83.0(4)        |
| C25         | C26         | C27         | 119.3(4)       |  | P1B         | F1          | P1A         | 7.99(18)       |
| C28         | C27         | C26         | 118.5(4)       |  | F7          | P2          | F8A         | 85.9(3)        |
| C27         | C28         | C29         | 120.2(4)       |  | F7          | P2          | F9A         | 86.8(4)        |
| N4          | C29         | C28         | 120.5(4)       |  | F7          | P2          | F10B        | 86.4(3)        |
| N4          | C29         | C30         | 114.9(4)       |  | F7          | P2          | F11A        | 89.3(3)        |
| C28         | C29         | C30         | 124.6(4)       |  | F8A         | P2          | F10B        | 156.2(5)       |
| N5          | C30         | C29         | 115.0(3)       |  | F8A         | P2          | F11A        | 83.9(4)        |
| N5          | C30         | C31         | 120.8(4)       |  | F8B         | P2          | F7          | 92.0(5)        |
| C31         | C30         | C29         | 124.1(4)       |  | F8B         | P2          | F8A         | 14.3(5)        |
| C32         | C31         | C30         | 119.7(4)       |  | F8B         | P2          | F9A         | 89.0(5)        |
| C33         | C32         | C31         | 118.9(4)       |  | F8B         | P2          | F10B        | 170.3(5)       |
| C32         | C33         | C34         | 119.3(4)       |  | F8B         | P2          | F11A        | 71.0(5)        |
| N5          | C34         | C33         | 122.5(4)       |  | F9A         | P2          | F8A         | 75.7(5)        |
| N1A         | Ru1A        | Cl1A        | 91.60(9)       |  | F9A         | P2          | F10B        | 81.4(5)        |
| N1A         | Ru1A        | N3A         | 159.75(13)     |  | F9A         | P2          | F11A        | 159.5(5)       |
| N1A         | Ru1A        | N5A         | 101.36(13)     |  | F9B         | P2          | F7          | 92.3(4)        |
| N2A         | Ru1A        | Cl1A        | 90.02(10)      |  | F9B         | P2          | F8A         | 90.0(5)        |
| N2A         | Ru1A        | N1A         | 79.98(13)      |  | F9B         | P2          | F8B         | 102.7(6)       |
| N2A         | Ru1A        | N3A         | 79.78(13)      |  | F9B         | P2          | F9A         | 14.9(5)        |
| N2A         | Ru1A        | N4A         | 96.68(14)      |  | F9B         | P2          | F10B        | 67.9(5)        |
| N2A         | Ru1A        | N5A         | 174.99(14)     |  | F9B         | P2          | F11A        | 173.6(5)       |
| N3A         | Ru1A        | Cl1A        | 87.74(10)      |  | F10A        | P2          | F7          | 92.3(3)        |

**Table S2.5 continued** Bond Angles for **3Cl·CH<sub>3</sub>CN·C<sub>5</sub>H<sub>10</sub>O**.

| Atom | Atom | Atom | Angle/°    | Atom | Atom | Atom | Angle/°   |
|------|------|------|------------|------|------|------|-----------|
| N3A  | Ru1A | N5A  | 98.87(13)  | F10A | P2   | F8A  | 173.7(4)  |
| N4A  | Ru1A | C11A | 173.27(10) | F10A | P2   | F8B  | 160.6(5)  |
| N4A  | Ru1A | N1A  | 90.21(13)  | F10A | P2   | F9A  | 110.2(5)  |
| N4A  | Ru1A | N3A  | 92.80(13)  | F10A | P2   | F9B  | 96.1(5)   |
| N4A  | Ru1A | N5A  | 78.52(14)  | F10A | P2   | F10B | 29.1(3)   |
| N5A  | Ru1A | C11A | 94.76(10)  | F10A | P2   | F11A | 90.1(4)   |
| C1A  | N1A  | Ru1A | 128.5(3)   | F10A | P2   | F11B | 65.6(5)   |
| C1A  | N1A  | C5A  | 118.5(3)   | F10B | P2   | F11A | 118.5(4)  |
| C5A  | N1A  | Ru1A | 113.0(3)   | F11B | P2   | F7   | 87.4(4)   |
| C6A  | N2A  | Ru1A | 119.0(3)   | F11B | P2   | F8A  | 108.3(5)  |
| C10A | N2A  | Ru1A | 119.6(3)   | F11B | P2   | F8B  | 95.7(6)   |
| C10A | N2A  | C6A  | 121.5(3)   | F11B | P2   | F9A  | 172.7(5)  |
| C11A | N3A  | Ru1A | 113.1(3)   | F11B | P2   | F9B  | 161.6(6)  |
| C15A | N3A  | Ru1A | 128.3(3)   | F11B | P2   | F10B | 93.8(5)   |
| C15A | N3A  | C11A | 118.5(4)   | F11B | P2   | F11A | 24.7(4)   |
| C25A | N4A  | Ru1A | 124.9(3)   | F12  | P2   | F7   | 177.4(2)  |
| C25A | N4A  | C29A | 118.6(4)   | F12  | P2   | F8A  | 91.9(3)   |
| C29A | N4A  | Ru1A | 116.5(3)   | F12  | P2   | F8B  | 86.1(5)   |
| C30A | N5A  | Ru1A | 115.3(3)   | F12  | P2   | F9A  | 91.4(4)   |
| C34A | N5A  | Ru1A | 126.8(3)   | F12  | P2   | F9B  | 86.5(4)   |
| C34A | N5A  | C30A | 117.9(4)   | F12  | P2   | F10A | 90.1(3)   |
| N1A  | C1A  | C2A  | 122.5(4)   | F12  | P2   | F10B | 95.2(3)   |
| C1A  | C2A  | C3A  | 119.6(4)   | F12  | P2   | F11A | 91.7(3)   |
| C2A  | C3A  | C4A  | 118.5(4)   | F12  | P2   | F11B | 94.5(4)   |
| C5A  | C4A  | C3A  | 119.8(4)   | C5S  | O1   | C7S  | 115.2(9)  |
| N1A  | C5A  | C4A  | 121.0(4)   | C9S  | O2   | C11S | 118.5(7)  |
| N1A  | C5A  | C6A  | 115.1(3)   | O1   | C5S  | C6S  | 114.4(9)  |
| C4A  | C5A  | C6A  | 123.9(4)   | O1   | C7S  | C8S  | 100.6(10) |
| N2A  | C6A  | C5A  | 113.0(3)   | O2   | C11S | C12S | 110.8(7)  |
| N2A  | C6A  | C7A  | 120.1(4)   | O2   | C9S  | C10S | 111.6(6)  |
| C7A  | C6A  | C5A  | 126.9(3)   | N1SB | C1SB | C2SB | 171(2)    |
| C6A  | C7A  | C8A  | 119.5(4)   | N2S  | C3S  | C4S  | 176.4(15) |
| C7A  | C8A  | C9A  | 119.2(4)   | N3S  | C3SA | C4SA | 175.3(14) |
| C7A  | C8A  | C16A | 119.4(4)   | N1SA | C1SA | C2SA | 174.7(12) |

**Table S2.6** Selected Bond Lengths for **4Cl·2CH<sub>3</sub>CN**.

| <b>Atom</b> | <b>Atom</b> | <b>Length/Å</b> |  | <b>Atom</b> | <b>Atom</b> | <b>Length/Å</b> |
|-------------|-------------|-----------------|--|-------------|-------------|-----------------|
| Ru1         | Cl1         | 2.3927(8)       |  | C8          | C16         | 1.424(4)        |
| Ru1         | N1          | 2.071(3)        |  | C9          | C10         | 1.381(4)        |
| Ru1         | N2          | 1.950(3)        |  | C10         | C11         | 1.468(4)        |
| Ru1         | N3          | 2.060(3)        |  | C11         | C12         | 1.386(5)        |
| Ru1         | N4          | 2.088(3)        |  | C12         | C13         | 1.368(5)        |
| Ru1         | N5          | 2.027(3)        |  | C13         | C14         | 1.378(5)        |
| O1          | N6          | 1.225(4)        |  | C14         | C15         | 1.379(5)        |
| O2          | N6          | 1.220(4)        |  | C16         | C17         | 1.201(5)        |
| N1          | C1          | 1.344(4)        |  | C17         | C18         | 1.432(4)        |
| N1          | C5          | 1.368(4)        |  | C18         | C19         | 1.399(5)        |
| N2          | C6          | 1.350(4)        |  | C18         | C23         | 1.392(5)        |
| N2          | C10         | 1.355(4)        |  | C19         | C20         | 1.383(5)        |
| N3          | C11         | 1.374(4)        |  | C20         | C21         | 1.384(5)        |
| N3          | C15         | 1.338(4)        |  | C21         | C22         | 1.367(5)        |
| N4          | C24         | 1.349(4)        |  | C22         | C23         | 1.386(5)        |
| N4          | C28         | 1.367(4)        |  | C24         | C25         | 1.381(5)        |
| N5          | C29         | 1.360(4)        |  | C25         | C26         | 1.376(5)        |
| N5          | C33         | 1.354(4)        |  | C26         | C27         | 1.385(5)        |
| N6          | C21         | 1.467(4)        |  | C27         | C28         | 1.377(5)        |
| C1          | C2          | 1.375(5)        |  | C28         | C29         | 1.478(4)        |
| C2          | C3          | 1.372(5)        |  | C29         | C30         | 1.381(4)        |
| C3          | C4          | 1.386(5)        |  | C30         | C31         | 1.382(5)        |
| C4          | C5          | 1.382(4)        |  | C31         | C32         | 1.383(5)        |
| C5          | C6          | 1.474(4)        |  | C32         | C33         | 1.372(5)        |
| C6          | C7          | 1.383(4)        |  | N8          | C3S         | 1.132(5)        |
| C7          | C8          | 1.407(5)        |  | C3S         | C4S         | 1.456(6)        |
| C8          | C9          | 1.393(5)        |  |             |             |                 |



**Table S2.7** Selected Bond Angles for 4Cl·2CH<sub>3</sub>CN.

| Atom | Atom | Atom | Angle/°    | Atom | Atom | Atom | Angle/°  |
|------|------|------|------------|------|------|------|----------|
| N1   | Ru1  | C11  | 89.27(7)   | C6   | C7   | C8   | 118.7(3) |
| N1   | Ru1  | N4   | 100.87(10) | C7   | C8   | C16  | 120.3(3) |
| N2   | Ru1  | C11  | 88.06(7)   | C9   | C8   | C7   | 119.7(3) |
| N2   | Ru1  | N1   | 79.41(10)  | C9   | C8   | C16  | 119.9(3) |
| N2   | Ru1  | N3   | 80.28(11)  | C10  | C9   | C8   | 119.2(3) |
| N2   | Ru1  | N4   | 176.02(11) | N2   | C10  | C9   | 120.0(3) |
| N2   | Ru1  | N5   | 97.58(10)  | N2   | C10  | C11  | 113.3(3) |
| N3   | Ru1  | C11  | 89.37(7)   | C9   | C10  | C11  | 126.7(3) |
| N3   | Ru1  | N1   | 159.68(10) | N3   | C11  | C10  | 115.1(3) |
| N3   | Ru1  | N4   | 99.44(10)  | N3   | C11  | C12  | 121.2(3) |
| N4   | Ru1  | C11  | 95.91(7)   | C12  | C11  | C10  | 123.8(3) |
| N5   | Ru1  | C11  | 174.36(8)  | C13  | C12  | C11  | 119.6(3) |
| N5   | Ru1  | N1   | 92.02(10)  | C12  | C13  | C14  | 119.5(3) |
| N5   | Ru1  | N3   | 91.31(10)  | C13  | C14  | C15  | 118.8(3) |
| N5   | Ru1  | N4   | 78.45(10)  | N3   | C15  | C14  | 123.0(3) |
| C1   | N1   | Ru1  | 128.5(2)   | C17  | C16  | C8   | 177.8(4) |
| C1   | N1   | C5   | 117.9(3)   | C16  | C17  | C18  | 178.5(4) |
| C5   | N1   | Ru1  | 113.6(2)   | C19  | C18  | C17  | 119.6(3) |
| C6   | N2   | Ru1  | 119.4(2)   | C23  | C18  | C17  | 120.1(3) |
| C6   | N2   | C10  | 122.1(3)   | C23  | C18  | C19  | 120.4(3) |
| C10  | N2   | Ru1  | 118.4(2)   | C20  | C19  | C18  | 119.9(3) |
| C11  | N3   | Ru1  | 112.9(2)   | C19  | C20  | C21  | 118.2(3) |
| C15  | N3   | Ru1  | 129.2(2)   | C20  | C21  | N6   | 117.8(3) |
| C15  | N3   | C11  | 117.8(3)   | C22  | C21  | N6   | 119.3(3) |
| C24  | N4   | Ru1  | 126.6(2)   | C22  | C21  | C20  | 122.9(3) |
| C24  | N4   | C28  | 118.0(3)   | C21  | C22  | C23  | 119.0(3) |
| C28  | N4   | Ru1  | 115.4(2)   | C22  | C23  | C18  | 119.5(3) |
| C29  | N5   | Ru1  | 117.3(2)   | N4   | C24  | C25  | 121.9(3) |
| C33  | N5   | Ru1  | 124.7(2)   | C26  | C25  | C24  | 120.0(3) |
| C33  | N5   | C29  | 118.0(3)   | C25  | C26  | C27  | 118.5(3) |
| O1   | N6   | C21  | 117.9(3)   | C28  | C27  | C26  | 119.6(3) |
| O2   | N6   | O1   | 123.2(3)   | N4   | C28  | C27  | 121.8(3) |
| O2   | N6   | C21  | 118.9(3)   | N4   | C28  | C29  | 114.0(3) |
| N1   | C1   | C2   | 122.5(3)   | C27  | C28  | C29  | 124.2(3) |
| C3   | C2   | C1   | 120.0(3)   | N5   | C29  | C28  | 114.7(3) |
| C2   | C3   | C4   | 118.5(3)   | N5   | C29  | C30  | 121.7(3) |
| C5   | C4   | C3   | 119.7(3)   | C30  | C29  | C28  | 123.6(3) |
| N1   | C5   | C4   | 121.5(3)   | C29  | C30  | C31  | 119.6(3) |
| N1   | C5   | C6   | 114.6(3)   | C30  | C31  | C32  | 118.8(3) |
| C4   | C5   | C6   | 123.9(3)   | C33  | C32  | C31  | 119.3(3) |
| N2   | C6   | C5   | 113.0(3)   | N5   | C33  | C32  | 122.6(3) |
| N2   | C6   | C7   | 120.2(3)   | N7   | C1S  | C2S  | 178.9(6) |
| C7   | C6   | C5   | 126.8(3)   | N8   | C3S  | C4S  | 179.5(5) |

### S3. DFT model validation

As a means of validating the computational models both the structural and vibrational accuracy were compared to with the experimental data by measuring the mean average deviation (MAD) values of both the Raman data and X-ray crystallography data shown in Tables S3.1-2. Only the chloro-complexes (**1-4Cl**) were considered as the aqua-complexes (**1-4H<sub>2</sub>O**) could not be obtained as a pure species.

**Table S3.1** Bond length comparison

| Bonds       | Bond lengths (Å)   |                    |                    |       |                    |       |
|-------------|--------------------|--------------------|--------------------|-------|--------------------|-------|
|             | [1Cl] <sup>+</sup> | [2Cl] <sup>+</sup> | [3Cl] <sup>+</sup> |       | [4Cl] <sup>+</sup> |       |
|             | DFT                | DFT                | X-ray              | DFT   | X-ray              | DFT   |
| Ru(1)-N(1)  | 1.975              | 1.976              | 1.963(3)           | 1.975 | 1.950 (3)          | 1.971 |
| Ru(1)-N(2)  | 2.085              | 2.086              | 2.073(3)           | 2.086 | 2.071 (3)          | 2.086 |
| Ru(1)-N(3)  | 2.085              | 2.086              | 2.066(3)           | 2.086 | 2.060 (3)          | 2.086 |
| Ru(1)-N(4)  | 2.063              | 2.062              | 2.035(3)           | 2.062 | 2.027 (3)          | 2.065 |
| Ru(1)-N(5)  | 2.095              | 2.094              | 2.082 (3)          | 2.094 | 2.088 (3)          | 2.097 |
| Ru(1)-Cl(1) | 2.462              | 2.462              | 2.4093(10)         | 2.462 | 2.3927 (8)         | 2.459 |
| C(16)-C(17) | 1.229              | 1.230              | 1.197 (6)          | 1.229 | 1.201 (5)          | 1.227 |

**Table S3.2** X-ray MAD values

| Complex            | X-ray MAD values (Å) |
|--------------------|----------------------|
| [3Cl] <sup>+</sup> | 0.024                |
| [4Cl] <sup>+</sup> | 0.028                |

**Table S3.3** Vibrational MAD values

| Complex            | Vibrational MAD values (cm <sup>-1</sup> ) |
|--------------------|--------------------------------------------|
| [1Cl] <sup>+</sup> | 10.2                                       |
| [2Cl] <sup>+</sup> | 11.0                                       |
| [3Cl] <sup>+</sup> | 10.3                                       |
| [4Cl] <sup>+</sup> | 10.0                                       |

## S4 Orbital Contributions

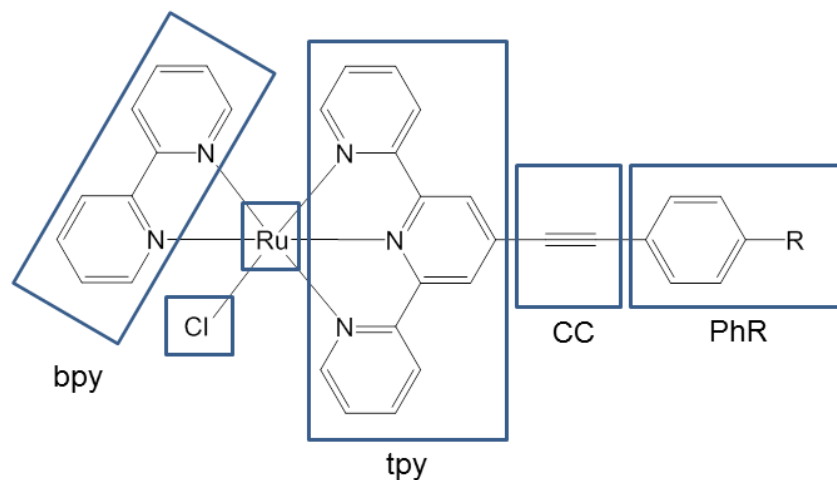

**Figure S4.1** Molecular components of  $[1Cl]^--[4Cl]^+$ , where R = H, OMe, Me, NO<sub>2</sub>.

**Table S4.1** Molecular compounds contributing to the molecular orbitals for  $[1Cl]^+$ .

| Molecular Orbital |      | Energy<br>(eV) | Molecular Components Contributions (%) |    |     |     |    |     |
|-------------------|------|----------------|----------------------------------------|----|-----|-----|----|-----|
|                   |      |                | Ru                                     | Cl | bpy | tpy | CC | PhR |
| 151               | L+6  | -1.43          | 1                                      | 0  | 0   | 85  | 3  | 10  |
| 150               | L+5  | -1.49          | 2                                      | 0  | 97  | 1   | 0  | 0   |
| 149               | L+4  | -1.73          | 1                                      | 0  | 72  | 27  | 0  | 0   |
| 148               | L+3  | -1.83          | 0                                      | 0  | 0   | 67  | 11 | 21  |
| 147               | L+2  | -2.46          | 5                                      | 0  | 29  | 65  | 0  | 0   |
| 146               | L+1  | -2.58          | 3                                      | 0  | 64  | 33  | 0  | 0   |
| 145               | LUMO | -2.83          | 9                                      | 1  | 1   | 75  | 7  | 7   |
| 144               | HOMO | -5.68          | 70                                     | 10 | 7   | 13  | 0  | 0   |
| 143               | H-1  | -5.75          | 61                                     | 10 | 3   | 16  | 5  | 5   |
| 142               | H-2  | -5.93          | 76                                     | 0  | 15  | 9   | 0  | 0   |
| 141               | H-3  | -6.77          | 5                                      | 9  | 0   | 14  | 25 | 47  |
| 140               | H-4  | -7.27          | 1                                      | 13 | 2   | 84  | 0  | 0   |

**Table S4.2** Molecular compounds contributing to the molecular orbitals for [2Cl]<sup>+</sup>.

| Molecular<br>Orbital |      | Energy<br>(eV) | Molecular Components Contributions (%) |    |     |     |    |     |
|----------------------|------|----------------|----------------------------------------|----|-----|-----|----|-----|
|                      |      |                | Ru                                     | Cl | bpy | tpy | CC | PhR |
| 159                  | L+6  | -1.40          | 6                                      | 0  | 26  | 68  | 0  | 0   |
| 158                  | L+5  | -1.48          | 2                                      | 0  | 97  | 1   | 0  | 0   |
| 157                  | L+4  | -1.73          | 1                                      | 0  | 72  | 27  | 0  | 0   |
| 156                  | L+3  | -1.77          | 0                                      | 0  | 0   | 73  | 10 | 16  |
| 155                  | L+2  | -2.45          | 5                                      | 0  | 25  | 70  | 0  | 0   |
| 154                  | L+1  | -2.57          | 3                                      | 0  | 68  | 29  | 0  | 0   |
| 153                  | LUMO | -2.79          | 9                                      | 1  | 1   | 77  | 6  | 6   |
| 152                  | HOMO | -5.66          | 70                                     | 10 | 7   | 13  | 0  | 0   |
| 151                  | H-1  | -5.68          | 54                                     | 8  | 2   | 14  | 8  | 13  |
| 150                  | H-2  | -5.91          | 76                                     | 0  | 15  | 9   | 0  | 0   |
| 149                  | H-3  | -6.34          | 12                                     | 6  | 1   | 11  | 13 | 58  |
| 148                  | H-4  | -7.25          | 1                                      | 12 | 2   | 85  | 0  | 0   |

**Table S4.3** Molecular compounds contributing to the molecular orbitals for [3Cl]<sup>+</sup>.

| Molecular<br>Orbital |      | Energy<br>(eV) | Molecular Components Contributions (%) |    |     |     |    |     |
|----------------------|------|----------------|----------------------------------------|----|-----|-----|----|-----|
|                      |      |                | Ru                                     | Cl | bpy | tpy | CC | PhR |
| 155                  | L+6  | -1.41          | 1                                      | 0  | 0   | 84  | 4  | 11  |
| 154                  | L+5  | -1.48          | 2                                      | 0  | 97  | 1   | 0  | 0   |
| 153                  | L+4  | -1.73          | 1                                      | 0  | 72  | 27  | 0  | 0   |
| 152                  | L+3  | -1.80          | 0                                      | 0  | 0   | 71  | 11 | 18  |
| 151                  | L+2  | -2.45          | 5                                      | 0  | 27  | 68  | 0  | 0   |
| 150                  | L+1  | -2.57          | 3                                      | 0  | 66  | 31  | 0  | 0   |
| 149                  | LUMO | -2.81          | 9                                      | 1  | 1   | 76  | 7  | 7   |
| 148                  | HOMO | -5.67          | 70                                     | 10 | 7   | 13  | 0  | 0   |
| 147                  | H-1  | -5.72          | 59                                     | 10 | 3   | 15  | 6  | 7   |
| 146                  | H-2  | -5.92          | 76                                     | 0  | 15  | 9   | 0  | 0   |
| 145                  | H-3  | -6.60          | 7                                      | 7  | 0   | 13  | 21 | 52  |
| 144                  | H-4  | -7.26          | 1                                      | 12 | 2   | 85  | 0  | 0   |

**Table S4.4** Molecular compounds contributing to the molecular orbitals for [4Cl]<sup>+</sup>.

| Molecular<br>Orbital |      | Energy<br>(eV) | Molecular Components Contributions (%) |    |     |     |    |     |
|----------------------|------|----------------|----------------------------------------|----|-----|-----|----|-----|
|                      |      |                | Ru                                     | Cl | bpy | tpy | CC | PhR |
| 162                  | L+6  | -1.51          | 2                                      | 0  | 97  | 1   | 0  | 0   |
| 161                  | L+5  | -1.75          | 1                                      | 0  | 72  | 27  | 0  | 0   |
| 160                  | L+4  | -1.82          | 0                                      | 0  | 0   | 68  | 10 | 21  |
| 159                  | L+3  | -2.51          | 6                                      | 0  | 40  | 54  | 0  | 0   |
| 158                  | L+2  | -2.61          | 2                                      | 0  | 54  | 44  | 0  | 0   |
| 157                  | L+1  | -2.80          | 8                                      | 1  | 1   | 72  | 5  | 14  |
| 156                  | LUMO | -3.63          | 2                                      | 0  | 0   | 8   | 5  | 85  |
| 155                  | HOMO | -5.73          | 70                                     | 10 | 7   | 13  | 0  | 0   |
| 154                  | H-1  | -5.85          | 62                                     | 11 | 3   | 17  | 4  | 3   |
| 153                  | H-2  | -6.00          | 76                                     | 0  | 15  | 9   | 0  | 0   |
| 152                  | H-3  | -7.17          | 2                                      | 19 | 1   | 17  | 28 | 33  |
| 151                  | H-4  | -7.31          | 1                                      | 13 | 3   | 83  | 0  | 0   |

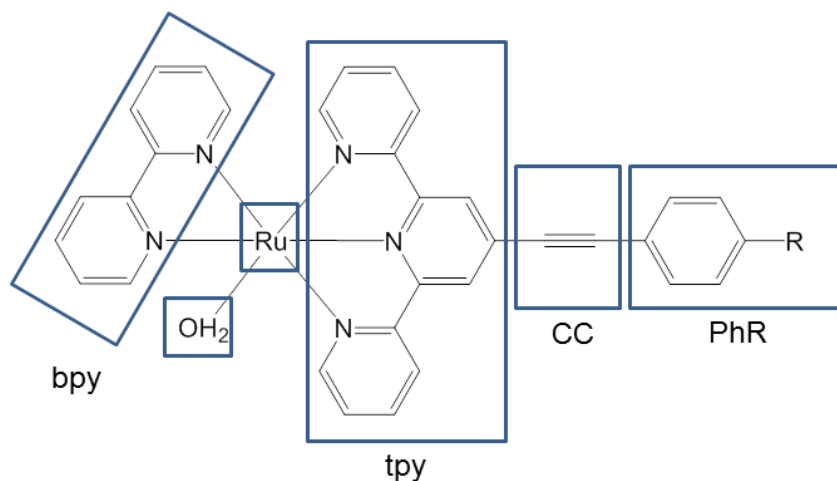

**Figure S4.2** Molecular components of  $[1\text{H}_2\text{O}]^{2+}$ - $[4\text{H}_2\text{O}]^{2+}$ , where R = H, OMe, Me, NO<sub>2</sub>.

**Table S4.5** Molecular compounds contributing to the molecular orbitals for  $[1\text{H}_2\text{O}]^{2+}$ .

| Molecular Orbital |      | Energy (eV) | Molecular Components Contributions (%) |                  |     |     |    |     |
|-------------------|------|-------------|----------------------------------------|------------------|-----|-----|----|-----|
|                   |      |             | Ru                                     | H <sub>2</sub> O | bpy | tpy | CC | PhR |
| 151               | L+10 | -0.53       | 1                                      | 0                | 0   | 44  | 5  | 50  |
| 150               | L+9  | -0.68       | 0                                      | 0                | 0   | 0   | 0  | 100 |
| 149               | L+8  | -0.88       | 67                                     | 19               | 8   | 6   | 0  | 0   |
| 148               | L+7  | -1.53       | 5                                      | 0                | 38  | 56  | 0  | 0   |
| 147               | L+6  | -1.54       | 1                                      | 0                | 0   | 86  | 4  | 10  |
| 146               | L+5  | -1.62       | 1                                      | 0                | 89  | 9   | 0  | 0   |
| 145               | L+4  | -1.82       | 1                                      | 0                | 67  | 31  | 0  | 0   |
| 144               | L+3  | -1.96       | 1                                      | 0                | 0   | 69  | 11 | 19  |
| 143               | L+2  | -2.59       | 5                                      | 0                | 35  | 60  | 0  | 0   |
| 142               | L+1  | -2.69       | 2                                      | 0                | 59  | 39  | 0  | 0   |
| 141               | LUMO | -3.07       | 7                                      | 0                | 0   | 77  | 7  | 7   |
| 140               | HOMO | -5.96       | 76                                     | 2                | 8   | 14  | 0  | 0   |
| 139               | H-1  | -6.15       | 76                                     | 0                | 15  | 9   | 0  | 0   |
| 138               | H-2  | -6.18       | 59                                     | 0                | 2   | 16  | 11 | 12  |
| 137               | H-3  | -6.95       | 20                                     | 0                | 1   | 14  | 20 | 45  |
| 136               | H-4  | -7.43       | 1                                      | 0                | 10  | 85  | 0  | 5   |
| 135               | H-5  | -7.44       | 0                                      | 0                | 1   | 4   | 0  | 95  |
| 134               | H-6  | -7.50       | 1                                      | 0                | 89  | 10  | 0  | 0   |
| 133               | H-7  | -8.14       | 0                                      | 0                | 0   | 5   | 86 | 9   |
| 132               | H-8  | -8.23       | 2                                      | 0                | 0   | 97  | 0  | 0   |
| 131               | H-9  | -8.59       | 2                                      | 0                | 0   | 31  | 24 | 42  |
| 130               | H-10 | -8.72       | 0                                      | 0                | 57  | 43  | 0  | 0   |

**Table S4.6** Molecular compounds contributing to the molecular orbitals for  $[2\text{H}_2\text{O}]^{2+}$ .

| Molecular<br>Orbital |      | Energy<br>(eV) | Molecular Components Contributions (%) |                  |     |     |    |     |
|----------------------|------|----------------|----------------------------------------|------------------|-----|-----|----|-----|
|                      |      |                | Ru                                     | H <sub>2</sub> O | bpy | tpy | CC | PhR |
| 159                  | L+10 | -0.50          | 68                                     | 3                | 3   | 15  | 1  | 9   |
| 158                  | L+9  | -0.83          | 0                                      | 0                | 0   | 1   | 0  | 99  |
| 157                  | L+8  | -1.05          | 68                                     | 18               | 8   | 6   | 0  | 0   |
| 156                  | L+7  | -1.68          | 1                                      | 0                | 0   | 83  | 5  | 11  |
| 155                  | L+6  | -1.71          | 5                                      | 0                | 46  | 49  | 0  | 0   |
| 154                  | L+5  | -1.75          | 2                                      | 0                | 89  | 9   | 0  | 0   |
| 153                  | L+4  | -1.99          | 1                                      | 0                | 60  | 39  | 0  | 0   |
| 152                  | L+3  | -2.08          | 1                                      | 0                | 0   | 75  | 10 | 14  |
| 151                  | L+2  | -2.75          | 5                                      | 0                | 35  | 60  | 0  | 0   |
| 150                  | L+1  | -2.84          | 2                                      | 0                | 59  | 39  | 0  | 0   |
| 149                  | LUMO | -3.17          | 8                                      | 1                | 0   | 79  | 6  | 6   |
| 148                  | HOMO | -6.04          | 38                                     | 1                | 2   | 13  | 13 | 34  |
| 147                  | H-1  | -6.24          | 79                                     | 0                | 8   | 12  | 0  | 0   |
| 146                  | H-2  | -6.31          | 72                                     | 0                | 15  | 12  | 0  | 0   |
| 145                  | H-3  | -6.62          | 38                                     | 2                | 1   | 12  | 6  | 40  |
| 144                  | H-4  | -7.59          | 1                                      | 0                | 17  | 82  | 0  | 0   |
| 143                  | H-5  | -7.65          | 1                                      | 0                | 81  | 16  | 0  | 1   |
| 142                  | H-6  | -7.65          | 0                                      | 0                | 1   | 1   | 0  | 98  |
| 141                  | H-7  | -8.11          | 3                                      | 1                | 0   | 22  | 33 | 42  |
| 140                  | H-8  | -8.20          | 0                                      | 0                | 0   | 5   | 86 | 9   |
| 139                  | H-9  | -8.40          | 2                                      | 0                | 0   | 97  | 0  | 0   |
| 138                  | H-10 | -8.90          | 0                                      | 0                | 64  | 36  | 0  | 0   |

**Table S4.7** Molecular compounds contributing to the molecular orbitals for  $[3\text{H}_2\text{O}]^{2+}$ .

| Molecular<br>Orbital |      | Energy<br>(eV) | Molecular Components Contributions (%) |                  |     |     |    |     |
|----------------------|------|----------------|----------------------------------------|------------------|-----|-----|----|-----|
|                      |      |                | Ru                                     | H <sub>2</sub> O | bpy | tpy | CC | PhR |
| 155                  | L+10 | -0.60          | 2                                      | 0                | 0   | 40  | 6  | 53  |
| 154                  | L+9  | -0.75          | 0                                      | 0                | 0   | 0   | 0  | 100 |
| 153                  | L+8  | -1.08          | 67                                     | 20               | 8   | 6   | 0  | 0   |
| 152                  | L+7  | -1.69          | 1                                      | 0                | 0   | 84  | 5  | 10  |
| 151                  | L+6  | -1.70          | 5                                      | 0                | 39  | 56  | 0  | 0   |
| 150                  | L+5  | -1.80          | 1                                      | 0                | 89  | 10  | 0  | 0   |
| 149                  | L+4  | -2.00          | 1                                      | 0                | 68  | 31  | 0  | 0   |
| 148                  | L+3  | -2.09          | 1                                      | 0                | 0   | 73  | 10 | 16  |
| 147                  | L+2  | -2.76          | 5                                      | 0                | 30  | 65  | 0  | 0   |
| 146                  | L+1  | -2.86          | 2                                      | 0                | 64  | 34  | 0  | 0   |
| 145                  | LUMO | -3.23          | 7                                      | 0                | 0   | 78  | 7  | 7   |
| 144                  | HOMO | -6.13          | 76                                     | 2                | 8   | 14  | 0  | 0   |
| 143                  | H-1  | -6.27          | 48                                     | 0                | 2   | 15  | 13 | 22  |
| 142                  | H-2  | -6.32          | 76                                     | 0                | 15  | 9   | 0  | 0   |
| 141                  | H-3  | -6.93          | 31                                     | 0                | 1   | 13  | 12 | 42  |
| 140                  | H-4  | -7.50          | 0                                      | 0                | 0   | 0   | 0  | 100 |
| 139                  | H-5  | -7.61          | 1                                      | 0                | 9   | 91  | 0  | 0   |
| 138                  | H-6  | -7.67          | 1                                      | 0                | 91  | 8   | 0  | 0   |
| 137                  | H-7  | -8.23          | 0                                      | 0                | 0   | 5   | 85 | 9   |
| 136                  | H-8  | -8.40          | 1                                      | 0                | 0   | 93  | 2  | 4   |
| 135                  | H-9  | -8.51          | 4                                      | 0                | 0   | 30  | 28 | 37  |
| 134                  | H-10 | -8.90          | 0                                      | 0                | 57  | 43  | 0  | 0   |



**Table S4.8** Molecular compounds contributing to the molecular orbitals for  $[4\text{H}_2\text{O}]^{2+}$ .

| Molecular<br>Orbital |      | Energy<br>(eV) | Molecular Components Contributions (%) |                  |     |     |    |     |
|----------------------|------|----------------|----------------------------------------|------------------|-----|-----|----|-----|
|                      |      |                | Ru                                     | H <sub>2</sub> O | bpy | tpy | CC | PhR |
| 162                  | L+10 | -0.91          | 66                                     | 19               | 9   | 7   | 0  | 0   |
| 161                  | L+9  | -1.18          | 0                                      | 0                | 0   | 0   | 0  | 100 |
| 160                  | L+8  | -1.55          | 5                                      | 0                | 39  | 56  | 0  | 0   |
| 159                  | L+7  | -1.55          | 1                                      | 0                | 0   | 82  | 4  | 13  |
| 158                  | L+6  | -1.64          | 1                                      | 0                | 89  | 10  | 0  | 0   |
| 157                  | L+5  | -1.84          | 1                                      | 0                | 67  | 32  | 0  | 0   |
| 156                  | L+4  | -1.93          | 1                                      | 0                | 0   | 70  | 10 | 19  |
| 155                  | L+3  | -2.64          | 6                                      | 0                | 52  | 43  | 0  | 0   |
| 154                  | L+2  | -2.73          | 1                                      | 0                | 42  | 56  | 0  | 0   |
| 153                  | L+1  | -3.01          | 6                                      | 0                | 0   | 69  | 4  | 20  |
| 152                  | LUMO | -3.68          | 2                                      | 0                | 0   | 13  | 6  | 79  |
| 151                  | HOMO | -6.01          | 76                                     | 2                | 8   | 14  | 0  | 0   |
| 150                  | H-1  | -6.20          | 76                                     | 0                | 15  | 9   | 0  | 0   |
| 149                  | H-2  | -6.31          | 69                                     | 0                | 3   | 16  | 6  | 5   |
| 148                  | H-3  | -7.36          | 10                                     | 0                | 0   | 17  | 30 | 41  |
| 147                  | H-4  | -7.47          | 0                                      | 0                | 21  | 79  | 0  | 0   |
| 146                  | H-5  | -7.52          | 1                                      | 0                | 79  | 20  | 0  | 0   |
| 145                  | H-6  | -7.98          | 0                                      | 0                | 0   | 0   | 0  | 100 |
| 144                  | H-7  | -8.26          | 2                                      | 0                | 0   | 97  | 0  | 0   |
| 143                  | H-8  | -8.37          | 0                                      | 0                | 0   | 5   | 80 | 15  |
| 142                  | H-9  | -8.66          | 0                                      | 0                | 0   | 1   | 8  | 92  |
| 141                  | H-10 | -8.74          | 0                                      | 0                | 57  | 42  | 0  | 0   |

## S5. Electronic spectra assignment

On the basis that the computational models are valid the electronic spectra were assigned by calculating each of the electronic transitions associated with the MLCT band. Shown in the following tables are first ten non-zero oscillator strength.

**Table S5.1.** First 10 excitations of [1Cl]<sup>+</sup>.

| Energy (cm <sup>-1</sup> ) | Wavelength (nm) | Osc. Strength | Major Contributions (%)                                 | Assignment |
|----------------------------|-----------------|---------------|---------------------------------------------------------|------------|
| 15469.01                   | 646.45          | 0.0109        | HOMO→LUMO 96                                            | MLCT       |
| 17341.84                   | 576.63          | 0.0019        | H-2→LUMO 94                                             | MLCT       |
| 18192.76                   | 549.66          | 0.0063        | HOMO→L+1 81                                             | MLCT       |
| 18346.01                   | 545.07          | 0.1241        | H-1→LUMO 57<br>HOMO→L+2 40                              | MLCT       |
| 19088.85                   | 523.86          | 0.0007        | H-1→L+1 77<br>H-1-→>L+2 18                              | MLCT       |
| 20246.26                   | 493.91          | 0.0358        | H-1→L+1 19<br>H-1→L+2 77                                | MLCT       |
| 20394.67                   | 490.32          | 0.2771        | H-2→L+2 25<br>H-1→LUMO 19<br>HOMO→L+1 17<br>HOMO→L+2 32 | MLCT       |
| 21137.51                   | 473.092         | 0.0554        | H-2→L+1 72<br>H-2→L+2 25                                | MLCT       |
| 22854.68                   | 437.54          | 0.0159        | H-2→L+1 16<br>H-2→L+2 41<br>HOMO→L+2 18                 | MLCT       |
| 26051.08                   | 383.86          | 0.0707        | HOMO→L+3 86                                             | MLCT       |

**Table S5.2.** First 10 excitations of [2Cl]<sup>+</sup>.

| <b>Energy<br/>(cm<sup>-1</sup>)</b> | <b>Wavelength<br/>(nm)</b> | <b>Osc.<br/>Strength</b> | <b>Major<br/>Contributions (%)</b>                      | <b>Assignment</b> |
|-------------------------------------|----------------------------|--------------------------|---------------------------------------------------------|-------------------|
| 15652.10                            | 638.89                     | 0.0117                   | HOMO→LUMO 96                                            | MLCT              |
| 17491.06                            | 571.72                     | 0.0022                   | H-2→LUMO 92                                             | MLCT              |
| 18103.23                            | 552.38                     | 0.0050                   | HOMO→L+1 82                                             | MLCT              |
| 18283.10                            | 546.95                     | 0.1736                   | H-1→LUMO 62<br>HOMO→L+2 33                              | MLCT              |
| 18821.07                            | 531.31                     | 0.0005                   | H-1→L+1 77<br>H-1→L+2 14                                | MLCT              |
| 20054.30                            | 498.64                     | 0.0351                   | H-1→L+1 16<br>H-1→L+2 79                                | MLCT              |
| 20306.76                            | 492.44                     | 0.3216                   | H-2→L+2 22<br>H-1→LUMO 17<br>HOMO→L+1 16<br>HOMO→L+2 37 | MLCT              |
| 21116.54                            | 473.56                     | 0.0520                   | H-2→L+1 68<br>H-2→L+2 30                                | MLCT              |
| 22764.34                            | 439.28                     | 0.0194                   | H-2→L+1 18<br>H-2→L+2 40<br>HOMO→L+2 18                 | MLCT              |
| 25442.93                            | 393.03                     | 0.4514                   | H-3→LUMO 86                                             | MLCT              |

**Table S5.3.** First 10 excitations of [3Cl]<sup>+</sup>.

| <b>Energy (cm<sup>-1</sup>)</b> | <b>Wavelength (nm)</b> | <b>Osc. Strength</b> | <b>Major Contributions (%)</b>                          | <b>Assignment</b> |
|---------------------------------|------------------------|----------------------|---------------------------------------------------------|-------------------|
| 15568.22                        | 642.33                 | 0.0114               | HOMO→LUMO 96                                            | MLCT              |
| 17424.92                        | 573.89                 | 0.0020               | H-2→LUMO 93                                             | MLCT              |
| 18148.40                        | 551.01                 | 0.0047               | HOMO→L+1 82                                             | MLCT              |
| 18333.10                        | 545.46                 | 0.1413               | H-1→LUMO 60<br>HOMO→L+2 36                              | MLCT              |
| 18969.48                        | 527.16                 | 0.0006               | H-1→L+1 78<br>H-1→L+2 16                                | MLCT              |
| 20176.09                        | 495.63                 | 0.0358               | H-1→L+1 18<br>H-1→L+2 78                                | MLCT              |
| 20364.02                        | 491.06                 | 0.2944               | H-2→L+2 24<br>H-1→LUMO 18<br>HOMO→L+1 16<br>HOMO→L+2 34 | MLCT              |
| 21128.64                        | 473.29                 | 0.0536               | H-2→L+1 70<br>H-2→L+2 27                                | MLCT              |
| 22817.58                        | 438.25                 | 0.0164               | H-2→L+1 17<br>H-2→L+2 40<br>HOMO→L+2 19                 | MLCT              |
| 26046.24                        | 383.93                 | 0.0434               | HOMO→L+4 94                                             | MLCT              |

**Table S5.4.** First 10 excitations of [4Cl]<sup>+</sup>.

| <b>Energy (cm<sup>-1</sup>)</b> | <b>Wavelength (nm)</b> | <b>Osc. Strength</b> | <b>Major Contributions (%)</b>             | <b>Assignment</b>            |
|---------------------------------|------------------------|----------------------|--------------------------------------------|------------------------------|
| 13345.34                        | 749.32                 | 0.0025               | HOMO→LUMO<br>HOMO→L+1                      | 77<br>22<br>MLCT             |
| 15414.97                        | 648.71                 | 0.0001               | H-2→LUMO<br>H-2→L+1                        | 74<br>25<br>MLCT             |
| 15802.12                        | 632.82                 | 0.3921               | H-1→LUMO                                   | 94<br>MLCT                   |
| 17454.76                        | 572.90                 | 0.0108               | HOMO→LUMO<br>HOMO→L+1                      | 22<br>75<br>MLCT             |
| 18479.90                        | 541.12                 | 0.0101               | HOMO→L+2<br>HOMO→L+3                       | 72<br>22<br>MLCT             |
| 19087.24                        | 523.91                 | 0.0042               | H-1→L+1<br>HOMO→L+2<br>HOMO→L+3            | 44<br>10<br>39<br>MLCT       |
| 19370.34                        | 516.25                 | 0.0014               | H-2→LUMO<br>H-2→L+1<br>H-1→L+2<br>H-1→L+3  | 20<br>49<br>18<br>12<br>MLCT |
| 19680.06                        | 508.12                 | 0.0004               | H-2→L+1<br>H-1→L+2<br>H-1→L+3              | 23<br>54<br>15<br>MLCT       |
| 20506.78                        | 487.64                 | 0.0382               | H-1→L+2<br>H-1→L+3                         | 26<br>69<br>MLCT             |
| 20711.65                        | 482.81                 | 0.1893               | H-2→L+3<br>H-1→L+1<br>HOMO→L+2<br>HOMO→L+3 | 30<br>35<br>15<br>16<br>MLCT |

**Table S5.5.** First 10 excitations of  $[\text{1H}_2\text{O}]^{2+}$ .

| Energy (cm <sup>-1</sup> ) | Wavelength (nm) | Osc. Strength | Major Contributions (%)                                 | Assignment |
|----------------------------|-----------------|---------------|---------------------------------------------------------|------------|
| 15988.43                   | 625.45          | 0.0136        | HOMO→LUMO 95                                            | MLCT       |
| 17581.39                   | 568.78          | 0.0028        | H-1→LUMO 96                                             | MLCT       |
| 19422.77                   | 514.85          | 0.0026        | HOMO→L+1 69<br>HOMO→L+2 24                              | MLCT       |
| 19827.66                   | 504.34          | 0.1494        | H-2→LUMO 56<br>HOMO→L+2 31                              | MLCT       |
| 21466.59                   | 465.84          | 0.3451        | H-2→LUMO 21<br>H-1→L+2 37<br>HOMO→L+1 19<br>HOMO→L+2 21 | MLCT       |
| 21629.51                   | 462.33          | 0.0001        | H-2→L+1 65<br>H-2→L+2 27                                | MLCT       |
| 21993.27                   | 454.68          | 0.1015        | H-1→L+1 81<br>H-1→L+2 14                                | MLCT       |
| 22663.52                   | 441.23          | 0.0234        | H-2→L+1 29<br>H-2→L+2 65                                | MLCT       |
| 23841.91                   | 419.42          | 0.0373        | H-2→LUMO 13<br>H-1→L+1 12<br>H-1→L+2 39<br>HOMO→L+2 20  | MLCT       |
| 26107.54                   | 383.03          | 0.0086        | HOMO→L+3 11<br>HOMO→L+8 48<br>HOMO→L+11 28              | MLCT       |

**Table S5.6.** First 10 excitations of  $[\text{2H}_2\text{O}]^{2+}$ .

| Energy (cm <sup>-1</sup> ) | Wavelength (nm) | Osc. Strength | Major Contributions (%)                   | Assignment |
|----------------------------|-----------------|---------------|-------------------------------------------|------------|
| 17087.78                   | 585.21          | 0.0074        | H-1→LUMO 95                               | MLCT       |
| 18105.65                   | 552.31          | 0.0103        | H-2→LUMO 95                               | MLCT       |
| 19091.27                   | 523.79          | 0.4255        | HOMO→LUMO 79                              | MLCT       |
| 20179.32                   | 495.55          | 0.0003        | H-3→L+1 10<br>HOMO→L+1 62<br>HOMO→L+2 20  | MLCT       |
| 20389.83                   | 490.44          | 0.0007        | H-1→L+1 57<br>H-1→L+2 41                  | MLCT       |
| 21080.25                   | 474.37          | 0.0280        | HOMO→L+1 24<br>HOMO→L+2 65                | MLCT       |
| 21590.80                   | 463.16          | 0.0754        | H-2→L+2 21<br>H-1→L+1 30<br>H-1→L+2 42    | MLCT       |
| 22213.46                   | 450.17          | 0.2724        | H-2→L+1 86                                | MLCT       |
| 23706.41                   | 421.82          | 0.1316        | H-3→LUMO 31<br>H-2→L+2 40<br>HOMO→LUMO 12 | MLCT       |
| 24746.06                   | 404.10          | 0.1010        | H-3→LUMO 52<br>H-2→L+2 22                 | MLCT       |

**Table S5.7.** First 10 excitations of  $[3\text{H}_2\text{O}]^{2+}$ .

| Energy (cm <sup>-1</sup> ) | Wavelength (nm) | Osc. Strength | Major Contributions (%)                                 | Assignment |
|----------------------------|-----------------|---------------|---------------------------------------------------------|------------|
| 16099.74                   | 621.12          | 0.0142        | HOMO→LUMO 96                                            | MLCT       |
| 17693.50                   | 565.17          | 0.0030        | H-2→LUMO 96                                             | MLCT       |
| 19366.31                   | 516.36          | 0.0024        | HOMO→L+1 73<br>HOMO→L+2 21                              | MLCT       |
| 19751.84                   | 506.28          | 0.2133        | H-1→LUMO 60<br>HOMO→L+2 27                              | MLCT       |
| 21394.00                   | 467.42          | 0.3890        | H-2→L+2 31<br>H-1→LUMO 19<br>HOMO→L+1 19<br>HOMO→L+2 27 | MLCT       |
| 21403.68                   | 467.20          | 0.0001        | H-1→L+1 66<br>H-1→L+2 21                                | MLCT       |
| 22002.95                   | 454.48          | 0.0843        | H-2→L+1 76<br>H-2→L+2 20                                | MLCT       |
| 22453.017                  | 445.37          | 0.0222        | H-1→L+1 24<br>H-1→L+2 68                                | MLCT       |
| 23744.31                   | 421.15          | 0.0514        | H-2→L+1 14<br>H-2→L+2 39<br>H-1→LUMO 12<br>HOMO→L+2 19  | MLCT       |
| 26129.31                   | 382.71          | 0.0073        | HOMO→L+8 48<br>HOMO→L+11 29                             | MLCT       |

**Table S5.8.** First 10 excitations of  $[4\text{H}_2\text{O}]^{2+}$ .

| Energy (cm <sup>-1</sup> ) | Wavelength (nm) | Osc. Strength | Major Contributions (%)                                 | Assignment |
|----------------------------|-----------------|---------------|---------------------------------------------------------|------------|
| 14743.91                   | 678.24          | 0.0069        | HOMO→LUMO 67<br>HOMO→L+1 30                             | MLCT       |
| 16344.93                   | 611.81          | 0.0009        | H-1→LUMO 67<br>H-1→L+1 31                               | MLCT       |
| 18940.44                   | 527.97          | 0.4351        | H-2→LUMO 73                                             | MLCT       |
| 19557.46                   | 511.31          | 0.0112        | HOMO→LUMO 31<br>HOMO→L+1 67                             | MLCT       |
| 19703.45                   | 507.52          | 0.0070        | HOMO→L+2 50<br>HOMO→L+3 44                              | MLCT       |
| 20989.11                   | 476.43          | 0.2746        | H-2→LUMO 16<br>H-1→L+3 14<br>HOMO→L+2 34<br>HOMO→L+3 28 | MLCT       |
| 21072.18                   | 474.55          | 0.0010        | H-1→LUMO 32<br>H-1→L+1 65                               | MLCT       |
| 21947.30                   | 455.63          | 0.0497        | H-1→L+2 78<br>H-1→L+3 15                                | MLCT       |
| 22266.70                   | 449.10          | 0.0001        | H-2→L+2 48<br>H-2→L+3 47                                | MLCT       |
| 22534.47                   | 443.76          | 0.0528        | H-2→L+1 53<br>H-1→L+2 13<br>H-1→L+3 19                  | MLCT       |

## S6. Assignment of vibrational spectra

On the basis that the SDD provided a valid model of the cationic complex the assignments were made based on the calculated spectra.

**Table S6.1.** Assignment of RR for [1Cl]<sup>+</sup>.

| $\nu_{RR}$<br>( $\text{cm}^{-1}$ ) | $\nu_{calc}$<br>( $\text{cm}^{-1}$ ) | Assignment                                                               |
|------------------------------------|--------------------------------------|--------------------------------------------------------------------------|
| 582                                | 595                                  | Asymm. in-plane ring bending of tpy- $\equiv$ -Ph and bpy v. delocalised |
| 663                                | 674                                  | symm. in-plane ring bending of tpy- $\equiv$ -Ph                         |
| 688                                | 732                                  | Symm. out-of-plane ring bending of tpy                                   |
| 754                                | 751                                  | Symm. out-of-plane ring bending of tpy and bpy                           |
| 921                                | 904                                  | Asymm. out-of-plane ring bending of tpy                                  |
| 1024                               | 1027                                 | Symm. in-plane ring stretching of tpy                                    |
| 1049                               | 1053                                 | Symm. in-plane ring stretching of tpy                                    |
| 1074                               | 1078                                 | Symm. in-plane ring stretching of tpy                                    |
| 1141                               | 1141                                 | Asymm. in-plane ring stretching of tpy                                   |
| 1164                               | 1167                                 | Symm. in-plane ring stretching of bpy                                    |
| 1270                               | 1270                                 | Asymm. in-plane ring stretching of tpy- $\equiv$ -Ph                     |
| 1357                               | 1394                                 | Symm. in-plane ring stretching of tpy- $\equiv$ -Ph                      |
| 1459                               | 1459                                 | Asymm. bpy ring stretch and H-wag                                        |
| 1523                               | 1523                                 | Asymm. bpy ring stretch and H-wag                                        |
| 1562                               | 1573                                 | Asymm. bpy ring stretch and H-wag                                        |
| 1604                               | 1590                                 | Symm. in-plane ring stretching of tpy- $\equiv$ -Ph, H-stretch           |



**Table S6.2.** Assignment of RR for [2Cl]<sup>+</sup>.

| <b><math>\nu_{RR}</math><br/>(<math>\text{cm}^{-1}</math>)</b> | <b><math>\nu_{calc}</math><br/>(<math>\text{cm}^{-1}</math>)</b> | <b>Assignment</b>                                                           |
|----------------------------------------------------------------|------------------------------------------------------------------|-----------------------------------------------------------------------------|
| 565                                                            | 595                                                              | Asymm. in-plane ring bending of tpy- $\equiv$ -PhOMe and bpy v. delocalised |
| 682                                                            | 689                                                              | Symm. in-plane ring bending of tpy- $\equiv$ -PhOMe                         |
| 923                                                            | 967                                                              | Asymm. out-of-plane ring bending of tpy                                     |
| 1024                                                           | 1016                                                             | Symm. in-plane ring stretching of tpy                                       |
| 1049                                                           | 1052                                                             | Symm. in-plane ring stretching of tpy                                       |
| 1076                                                           | 1078                                                             | Symm. in-plane ring stretching of tpy                                       |
| 1141                                                           | 1141                                                             | Asymm. in-plane ring stretching of tpy                                      |
| 1164                                                           | 1166                                                             | Symm. in-plane ring stretching of bpy                                       |
| 1259                                                           | 1261                                                             | Symm. in-plane ring stretching of bpy                                       |
| 1286                                                           | 1286                                                             | Asymm. in-plane ring stretching of tpy, H-wag                               |
| 1357                                                           | 1395                                                             | Symm. in-plane ring stretching of tpy- $\equiv$ -PhOMe,                     |
| 1469                                                           | 1458                                                             | Asymm. bpy ring stretch and H-wag                                           |
| 1523                                                           | 1521                                                             | Asymm. bpy ring stretch and H-wag                                           |
| 1562                                                           | 1573                                                             | Asymm. bpy ring stretch and H-wag                                           |
| 1602                                                           | 1597                                                             | Symm. in-plane ring stretching of tpy- $\equiv$ -PhOMe, H-stretch           |

**Table S6.3.** Assignment of RR for [3Cl]<sup>+</sup>.

| <b><math>\nu_{RR}</math><br/>(<math>\text{cm}^{-1}</math>)</b> | <b><math>\nu_{\text{calc}}</math><br/>(<math>\text{cm}^{-1}</math>)</b> | <b>Assignment</b>                                                               |
|----------------------------------------------------------------|-------------------------------------------------------------------------|---------------------------------------------------------------------------------|
| 622                                                            | 624                                                                     | Asymm. out-of-plane ring bending of bpy and tpy- $\equiv$ -PhMe, v. delocalised |
| 661                                                            | 666                                                                     | Symm. in-plane ring bending of tpy- $\equiv$ -PhMe                              |
| 688                                                            | 694                                                                     | Symm. in-plane ring bending of tpy- $\equiv$ -PhMe                              |
| 763                                                            | 785                                                                     | Symm. in-plane ring bending of tpy- $\equiv$ -PhMe                              |
| 923                                                            | 968                                                                     | Symm. in-plane ring bending of tpy- $\equiv$ -PhMe                              |
| 1024                                                           | 1016                                                                    | Symm. in-plane ring stretching of tpy                                           |
| 1049                                                           | 1052                                                                    | Symm. in-plane ring stretching of tpy                                           |
| 1072                                                           | 1078                                                                    | Asymm. in-plane ring stretching of tpy                                          |
| 1114                                                           | 1120                                                                    | Symm. in-plane ring stretching of tpy- $\equiv$ -PhMe                           |
| 1141                                                           | 1141                                                                    | Asymm. in-plane ring stretching of tpy                                          |
| 1166                                                           | 1167                                                                    | Symm. in-plane ring stretching of bpy                                           |
| 1278                                                           | 1271                                                                    | Asymm. in-plane ring stretching of tpy, H-wag                                   |
| 1357                                                           | 1395                                                                    | Symm. in-plane ring stretching of tpy- $\equiv$ -PhMe,                          |
| 1459                                                           | 1459                                                                    | Asymm. bpy ring stretch and H-wag                                               |
| 1519                                                           | 1522                                                                    | Asymm. bpy ring stretch and H-wag                                               |
| 1558                                                           | 1573                                                                    | Asymm. bpy ring stretch and H-wag                                               |
| 1604                                                           | 1596                                                                    | Symm. in-plane ring stretching of tpy- $\equiv$ -PhMe, H-stretch                |

**Table S6.4.** Assignment of RR for [4Cl]<sup>+</sup>.

| <b>V<sub>RR</sub></b><br><b>(cm<sup>-1</sup>)</b> | <b>V<sub>calc</sub></b><br><b>(cm<sup>-1</sup>)</b> | <b>Assignment</b>                                                                 |
|---------------------------------------------------|-----------------------------------------------------|-----------------------------------------------------------------------------------|
| 553                                               | 543                                                 | Symm. out-of-plane ring bending of tpy-≡-PhNO <sub>2</sub> and bpy v. delocalised |
| 682                                               | 675                                                 | Symm. in-plane ring bending of tpy-≡-PhNO <sub>2</sub>                            |
| 923                                               | 968                                                 | Symm. out-of-plane ring bending of tpy                                            |
| 1024                                              | 1015                                                | Symm. in-plane ring stretching of tpy                                             |
| 1049                                              | 1052                                                | Symm. in-plane ring stretching of tpy                                             |
| 1076                                              | 1095                                                | Asymm. in-plane ring stretching of tpy                                            |
| 1141                                              | 1141                                                | Asymm. in-plane ring stretching of tpy                                            |
| 1166                                              | 1168                                                | Symm. in-plane ring stretching of bpy                                             |
| 1257                                              | 1261                                                | Symm. in-plane ring stretching of tpy-≡-PhNO <sub>2</sub>                         |
| 1274                                              | 1270                                                | Asymm. in-plane ring stretching of tpy                                            |
| 1357                                              | 1339                                                | Asymm. in-plane ring stretching of tpy                                            |
| 1469                                              | 1471                                                | Symm. in-plane ring stretching of tpy-≡-PhNO <sub>2</sub>                         |
| 1523                                              | 1523                                                | Asymm. bpy ring stretch and H-wag                                                 |
| 1562                                              | 1574                                                | Asymm. bpy ring stretch and H-wag                                                 |
| 1604                                              | 1589                                                | Symm. in-plane ring stretching of tpy-≡-PhNO <sub>2</sub> , H-stretch             |

**Table S6.5.** Assignment of RR for [1H<sub>2</sub>O]<sup>2+</sup>.

| <b>v<sub>RR</sub></b><br><b>(cm<sup>-1</sup>)</b> | <b>v<sub>calc</sub></b><br><b>(cm<sup>-1</sup>)</b> | <b>Assignment</b>                                    |
|---------------------------------------------------|-----------------------------------------------------|------------------------------------------------------|
| 538                                               | 550                                                 | Assym. Bpy and tpy-≡-Ph out-of-plane wag             |
| 584                                               | 585                                                 | Assym. H <sub>2</sub> O wag                          |
| 665                                               | 673                                                 | Symm. Ph-≡-tpy in-plane ring distortion              |
| 686                                               | 684                                                 | Symm. -Ph H-wag out-of-plane                         |
| 750                                               | 747                                                 | Symm. H-wag out-of-plane bpy and tpy                 |
| 902                                               | 902                                                 | Symm. H-wag out-of-plane tpy                         |
| 1024                                              | 1024                                                | Asymm. tpy and bpy in-plane ring distortion          |
| 1047                                              | 1047                                                | Asymm. bpy in-plane ring distortion                  |
| 1074                                              | 1078                                                | Symm tpy in-plane H-wag                              |
| 1139                                              | 1139                                                | Asymm tpy in-plane H-wag                             |
| 1170                                              | 1172                                                | Symm bpy in-plane H-wag                              |
| 1284                                              | 1285                                                | Asymm tpy in-plane H-wag                             |
| 1361                                              | 1344                                                | Asymm tpy-≡-Ph in-plane H-wag                        |
| 1471                                              | 1470                                                | Symm tpy-≡-Ph in-plane H-wag                         |
| 1521                                              | 1527                                                | Symm bpy in-plane H-wag                              |
| 1560                                              | 1567                                                | Symm tpy-≡-Ph in-plane ring distortion               |
| 1602                                              | 1579                                                | Symm. in-plane ring stretching of tpy-≡-Ph H-stretch |

**Table S6.6.** Assignment of RR for [2H<sub>2</sub>O]<sup>2+</sup>.

| <b>v<sub>RR</sub></b><br><b>(cm<sup>-1</sup>)</b> | <b>v<sub>calc</sub></b><br><b>(cm<sup>-1</sup>)</b> | <b>Assignment</b>                                      |
|---------------------------------------------------|-----------------------------------------------------|--------------------------------------------------------|
| 667                                               | 662                                                 | Symm. in-plane ring distortion MeOPh≡-tpy              |
| 1024                                              | 1025                                                | Symm. in-plane H-wag MeOPh≡-tpy                        |
| 1170                                              | 1170                                                | Symm. in-plane H-wag MeOPh≡-tpy                        |
| 1278                                              | 1278                                                | Symm. in-plane ring distortion MeOPh≡-tpy              |
| 1319                                              | 1311                                                | Asymm. in-plane ring distortion MeOPh≡-tpy             |
| 1361                                              | 1345                                                | Asymm. in-plane ring distortion MeOPh≡-tpy             |
| 1482                                              | 1480                                                | Asymm. in-plane ring distortion MeOPh≡-tpy             |
| 1552                                              | 1567                                                | Symm. in-plane ring distortion MeOPh≡-tpy              |
| 1600                                              | 1581                                                | Symm. in-plane ring stretching of MeOPh≡-tpy H-stretch |

**Table S6.7.** Assignment of RR for [3H<sub>2</sub>O]<sup>2+</sup>.

| <b>v<sub>RR</sub></b><br><b>(cm<sup>-1</sup>)</b> | <b>v<sub>calc</sub></b><br><b>(cm<sup>-1</sup>)</b> | <b>Assignment</b>                                     |
|---------------------------------------------------|-----------------------------------------------------|-------------------------------------------------------|
| 553                                               | 550                                                 | Assym. out-of-plane ring distortion bpy and MePh≡-tpy |
| 682                                               | 692                                                 | Assym. in-plane ring distortion MePh≡-tpy             |
| 794                                               | 794                                                 | Sym. out-of-plane H-wag tpy                           |
| 923                                               | 908                                                 | Assym. out-of-plane H-wag tpy                         |
| 1047                                              | 1047                                                | Assym. in-plane ring distortion bpy                   |
| 1141                                              | 1138                                                | Assym. in-plane ring distortion MePh≡-tpy             |
| 1276                                              | 1275                                                | Sym. in-plane ring distortion MePh≡-tpy               |
| 1359                                              | 1344                                                | Sym. in-plane ring distortion MePh≡-tpy               |
| 1471                                              | 1463                                                | Sym. in-plane ring distortion of bpy                  |
| 1525                                              | 1527                                                | Sym. in-plane ring distortion of bpy                  |
| 1563                                              | 1569                                                | Sym. in-plane ring distortion MePh≡-tpy               |
| 1604                                              | 1598                                                | Symm. in-plane ring stretching of MePh≡-tpy H-stretch |

**Table S6.8.** Assignment of RR for  $[4\text{H}_2\text{O}]^{2+}$ .

| $\nu_{\text{RR}}$<br>( $\text{cm}^{-1}$ ) | $\nu_{\text{calc}}$<br>( $\text{cm}^{-1}$ ) | Assignment                                                                         |
|-------------------------------------------|---------------------------------------------|------------------------------------------------------------------------------------|
| 624                                       | 621                                         | Symm. out-of-plane ring distortion tpy                                             |
| 667                                       | 674                                         | Symm. in-plane ring distortion $\text{NO}_2\text{Ph}\equiv\text{tpy}$              |
| 690                                       | 674                                         | Symm. in-plane ring distortion $\text{NO}_2\text{Ph}\equiv\text{tpy}$              |
| 790                                       | 790                                         | Asymm. out-of-plan H-wag tpy                                                       |
| 923                                       | 911                                         | Asymm. out-of-plan H-wag tpy                                                       |
| 1027                                      | 1024                                        | Asymm. in-plane ring distortion $\text{NO}_2\text{Ph}\equiv\text{tpy}$ and bpy     |
| 1049                                      | 1047                                        | Asymm. in-plane ring distortion bpy                                                |
| 1143                                      | 1138                                        | Asymm. in-plane ring distortion $\text{NO}_2\text{Ph}\equiv\text{tpy}$             |
| 1288                                      | 1285                                        | Asymm. out-of-plan H-wag $\text{NO}_2\text{Ph}\equiv\text{tpy}$                    |
| 1359                                      | 1342                                        | Asymm. in-plane ring distortion $\text{NO}_2\text{Ph}\equiv\text{tpy}$             |
| 1471                                      | 1470                                        | Symm. in-plane ring distortion $\text{NO}_2\text{Ph}\equiv\text{tpy}$              |
| 1525                                      | 1527                                        | Asymm. in-plane ring distortion bpy                                                |
| 1594                                      | 1586                                        | Symm. in-plane ring distortion $\text{NO}_2\text{Ph}\equiv\text{tpy}$              |
| 1608                                      | 1601                                        | Symm. in-plane ring stretching of $\text{NO}_2\text{Ph}\equiv\text{tpy}$ H-stretch |
